# Supplementary material
Source: PubMed Central journal article supplement (PMC3268375)
Supplement: NIHMS345178-supplement-1_si_001.pdf [file NIHMS345178-supplement-1_si_001.pdf]

# Enantioselective Palladium-Catalyzed [3+2] Cycloadditions of Trimethylenemethane with Nitroalkenes

Barry M. Trost,\* Dustin A. Bringley and Pamela S. Seng  
*Department of Chemistry, Stanford University, Stanford, CA 94305-5080*

## Supporting Information

**A. General Methods.** All TMM reactions were carried out under an argon atmosphere. Solvents were dried by passing through an Alumina column. All compounds were purchased from commercial sources and used directly unless listed. *m*-chloroperoxybenzoic acid was purified by the known method.<sup>1</sup> Diaza(1,3)bicyclo[5.4.0]undene (DBU) and 3-buten-2-one were purified by distillation prior to use. Solutions of potassium *tert*-butoxide were prepared by combining equimolar amounts of distilled *tert*-butanol and potassium hydride (from a 30-35% mineral oil dispersion thrice rinsed with hexanes and dried under vacuum) in THF; after stirring 30 minutes the suspension was allowed to settle and the supernatant was used directly. The following compounds were prepared according to known literature procedures: Pd(dba)<sub>2</sub>,<sup>2</sup> 3-acetoxy-2-trimethylsilylmethyl-1-propene **1**,<sup>3</sup> **L1**,<sup>4</sup> and **L2-L5**.<sup>5</sup> Nitroalkenes that were not commercially available were prepared following the general procedure of Worrall.<sup>6</sup>

Flash chromatography was performed with 0.040-0.063  $\mu\text{m}$  Silica Gel. <sup>1</sup>H and <sup>13</sup>C NMR spectroscopy was performed on a Mercury NMR at 400 (<sup>1</sup>H) or 100 (<sup>13</sup>C) MHz and Unity NMR at 500 (<sup>1</sup>H) or 125 (<sup>13</sup>C) MHz. Chemical shifts are reported in ppm relative to tetramethylsilane or residual protiated solvent. All <sup>13</sup>C NMR spectra were proton decoupled. Infrared spectroscopic data was recorded on sodium chloride plates as thin films on a Perkin-Elmer Paragon 500 FT-IR spectrometer. Chiral HPLC analysis was performed on a Thermo Separation Products Spectra Series P-100 and on an Agilent Technologies 1200 Series using Chiralcel® columns. Optical rotations were measured on a Jasco DIP-1000 digital polarimeter using 5 cm glass cells with a Na 589 nm filter.

## B. Synthesis of Nitrocyclopentanes

**General procedure A for the asymmetric TMM cycloadditions with nitroalkenes.**

To an argon-purged vial of substrate (0.075 mmol), ligand **L5** (0.0075 mmol) and Pd(dba)<sub>2</sub> (0.0038 mmol) was added toluene (0.5 ml) and the solution stirred for 2 minutes before 2-((trimethylsilyl)methyl)allyl acetate (25 μL, 0.12 mmol) was added. After stirring for 4 or 24 hours (at 50 or 23 °C, respectively), the solution was concentrated and purified by flash chromatography.

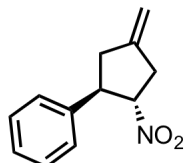

**((1R,2S)-4-methylene-2-nitrocyclopentyl)benzene (6):** The reaction was performed with 11.3 mg (0.076 mmol) of trans-β-nitrostyrene according to general procedure A in toluene at 50 °C and purified by flash chromatography (4% ethyl acetate in hexanes) to give the product as a clear, colorless oil (14.4 mg, 93% yield) that solidified on standing. <sup>1</sup>H NMR (500 MHz, CDCl<sub>3</sub>): δ 7.35-7.22 (m, 5H), 5.07 (quintet, *J* = 2.5 Hz, 1H), 5.06 (quintet, *J* = 2.5 Hz, 1H), 4.95 (q, *J* = 7.9 Hz, 1H), 3.82 (q, *J* = 3.82 Hz, 1H), 3.11-3.06 (m, 2H), 3.02-2.96 (m, 1H), 2.67-2.60 (m, 1H). <sup>13</sup>C NMR (125 MHz, CDCl<sub>3</sub>): δ 144.8, 139.9, 129.2, 127.9, 127.3, 109.2, 91.5, 50.7, 39.1, 38.5. IR (thin film): 3031, 2919, 1662, 1549, 1495, 1432, 1369 cm<sup>-1</sup>. [α]<sub>26</sub><sup>D</sup> = +123.9 (c 0.49, CHCl<sub>3</sub>). Chiral HPLC: Chiralcel IA, 0.8 mL/min, 1% *i*-PrOH in heptane, λ = 220 nm, *t*<sub>R, major</sub> = 9.5 min, *t*<sub>R, minor</sub> = 10.9 min. HRMS: calcd for (M+Na<sup>+</sup>) C<sub>12</sub>H<sub>13</sub>NO<sub>2</sub>Na 226.0844; found 226.0852. MP 58-59 °C.

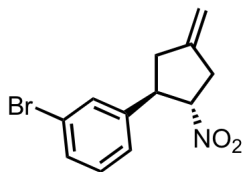

**1-bromo-3-((1R,2S)-4-methylene-2-nitrocyclopentyl)benzene (7):** The reaction was performed with 17.1 mg (0.075 mmol) of nitroalkene according to general procedure A in toluene at 50 °C and purified by flash chromatography (4% ethyl acetate in hexanes) to

give the product as a clear, colorless oil (13.3 mg, 63% yield).  $^1\text{H}$  NMR (400 MHz,  $\text{CDCl}_3$ ):  $\delta$  7.43-7.38 (m, 2H), 7.21 (t,  $J = 7.6$  Hz, 1H), 7.16 (dt,  $J = 1.6, 7.6$  Hz, 1H), 5.08 (apparent septet,  $J = 2.2$  Hz, 2H), 4.93 (q,  $J = 8$  Hz, 1H), 3.79 (q,  $J = 8.4$  Hz, 1H), 3.12-3.07 (m, 2H), 3.04-2.95 (m, 1H), 2.65-2.55 (m, 1H).  $^{13}\text{C}$  NMR (100 MHz,  $\text{CDCl}_3$ ):  $\delta$  144.1, 142.3, 131.2, 130.8, 130.4, 126.2, 123.3, 109.7, 91.2, 50.2, 39.1, 38.5. IR (thin film): 3078, 2918, 1662, 1595, 1549, 1477, 1429, 1368, 1074  $\text{cm}^{-1}$ .  $[\alpha]_{24}^{\text{D}} = 67.9$  (c 1.27,  $\text{CHCl}_3$ ). Chiral HPLC: Chiralcel OD, 0.8 mL/min, 10% *i*-PrOH in heptane,  $\lambda = 240$  nm,  $t_{\text{R, major}} = 8.5$  min,  $t_{\text{R, minor}} = 9.4$  min. HRMS: calcd for  $(\text{M}+\text{H}^+)$   $\text{C}_{12}\text{H}_{13}\text{BrNO}_2$  282.0129; found 282.0124.

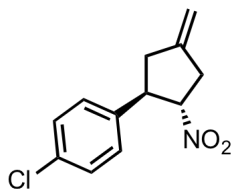

**1-chloro-4-((1R,2S)-4-methylene-2-nitrocyclopentyl)benzene (8):** The reaction was performed with 13.8 mg (0.075 mmol) of nitroalkene according to general procedure A in toluene at 50 °C and purified by flash chromatography (4% ethyl acetate in hexanes) to give the product as a clear, colorless oil (11.7 mg, 65% yield).  $^1\text{H}$  NMR (400 MHz,  $\text{CDCl}_3$ ):  $\delta$  7.33-7.28 (m, 2H), 7.20-7.14 (m, 2H), 5.07 (apparent septet,  $J = 2.2$  Hz, 2H), 4.90 (q,  $J = 8.0$  Hz, 1H), 3.79 (q,  $J = 9.2$  Hz, 1H), 3.12-3.05 (m, 2H), 2.98 (dd,  $J = 9.2$  Hz, 17.6, 1H), 2.64-2.53 (m, 1H).  $^{13}\text{C}$  NMR (100 MHz,  $\text{CDCl}_3$ ):  $\delta$  144.3, 138.4, 133.8, 129.5, 128.7, 109.6, 91.4, 50.1, 39.1, 38.5. IR (thin film): 2923, 1636, 1594, 1550, 1494, 1369, 1341, 1092, 1014  $\text{cm}^{-1}$ .  $[\alpha]_{24}^{\text{D}} = 66.4$  (c 1.12,  $\text{CHCl}_3$ ). Chiral HPLC: Chiralcel OD, 0.8 mL/min, 10% *i*-PrOH in heptane,  $\lambda = 240$  nm,  $t_{\text{R, major}} = 7.0$  min,  $t_{\text{R, minor}} = 8.0$  min. HRMS: calcd for  $(\text{M}+\text{H}^+)$   $\text{C}_{12}\text{H}_{13}\text{ClNO}_2$  238.0635; found 238.0630.

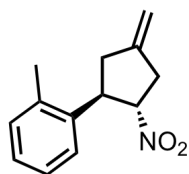

**1-methyl-2-((1*R*,2*S*)-4-methylene-2-nitrocyclopentyl)benzene (9):** The reaction was performed with 13.6  $\mu$ l (0.075 mmol) of nitroalkene according to general procedure A in toluene at 23 °C and purified by flash chromatography (2% ethyl acetate in hexanes) to give the product as a clear, colorless oil (14.7 mg, 91% yield).  $^1\text{H}$  NMR (400 MHz,  $\text{CDCl}_3$ ):  $\delta$  7.22-7.13 (m, 4H), 5.08 (apparent sextet,  $J = 2.4$  Hz, 2H), 4.98 (q,  $J = 7.2$  Hz, 1H), 4.13-4.06 (m, 1H), 3.10-2.97 (m, 3H), 2.59-2.48 (m, 1H), 2.38 (s, 3H).  $^{13}\text{C}$  NMR (100 MHz,  $\text{CDCl}_3$ ):  $\delta$  145.6, 138.6, 136.7, 131.1, 127.6, 127.0, 125.5, 109.1, 91.0, 46.4, 38.9, 38.1, 20.0. IR (thin film): 3076, 3022, 2957, 1661, 1549, 1493, 1462, 1435, 1367, 1173, 1053  $\text{cm}^{-1}$ .  $[\alpha]_{24}^{\text{D}} = 61.1$  (c 1.46,  $\text{CHCl}_3$ ). Chiral HPLC: Chiralcel OD, 0.8 mL/min, 10% *i*-PrOH in heptane,  $\lambda = 240$  nm,  $t_{\text{R, major}} = 6.8$  min,  $t_{\text{R, minor}} = 8.2$  min. HRMS: calcd for ( $\text{M}+\text{H}^+$ )  $\text{C}_{13}\text{H}_{16}\text{NO}_2$  218.1181; found 218.1176.

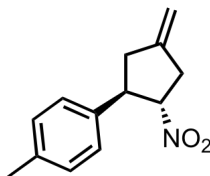

**1-methyl-4-((1*R*,2*S*)-4-methylene-2-nitrocyclopentyl)benzene (10):** The reaction was performed with 12.2 mg (0.075 mmol) of nitroalkene according to general procedure A in toluene at 50 °C and purified by flash chromatography (2% ethyl acetate in hexanes) to give the product as a clear, colorless oil (13.3 mg, 82% yield).  $^1\text{H}$  NMR (400 MHz,  $\text{CDCl}_3$ ):  $\delta$  7.16-7.10 (m, 4H), 5.08-5.03 (m, 2H), 4.92 (q,  $J = 8.0$ , 1H), 3.78 (q,  $J = 9.2$  Hz, 1H), 3.10-3.05 (m, 2H), 2.97 (dd, 8.4, 16.8 Hz, 1H), 2.65-2.56 (m, 1H), 2.33 (s, 3H).  $^{13}\text{C}$  NMR (100 MHz,  $\text{CDCl}_3$ ):  $\delta$  144.9, 137.7, 136.9, 129.9, 127.2, 109.2, 91.7, 50.5, 39.2, 38.6, 21.4. IR (thin film): 3024, 2922, 1661, 1550, 1517, 1432, 1368, 1319, 1258, 1167, 1112  $\text{cm}^{-1}$ .  $[\alpha]_{24}^{\text{D}} = 106.2$  (c 1.25,  $\text{CHCl}_3$ ). Chiral HPLC: Chiralcel OD, 0.8 mL/min, 1% *i*-PrOH in heptane,  $\lambda = 220$  nm,  $t_{\text{R, major}} = 8.6$  min,  $t_{\text{R, minor}} = 10.5$  min. HRMS: calcd for ( $\text{M}+\text{H}^+$ )  $\text{C}_{13}\text{H}_{16}\text{NO}_2$  218.1181; found 218.1176.

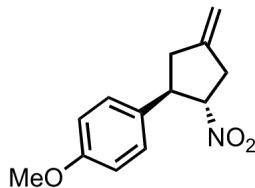

**1-methoxy-4-((1R,2S)-4-methylene-2-nitrocyclopentyl)benzene (11):** The reaction was performed with 13.4 mg (0.075 mmol) of nitroalkene according to general procedure A in toluene at 23 °C and purified by flash chromatography (4% ethyl acetate in hexanes) to give the product as a clear, colorless oil (12.6 mg, 72% yield). <sup>1</sup>H NMR (400 MHz, CDCl<sub>3</sub>): δ 7.18-7.13 (m, 2H), 6.89-6.84 (m, 2H), 5.08-5.03 (m, 2H), 4.90 (q, *J* = 8.0 Hz, 1H), 3.79 (s, 3H), 3.78-3.72 (m, 1H), 3.10-3.04 (m, 2H), 2.96 (dd, *J* = 8.4 Hz, 16.8 Hz, 1H), 2.64-2.54 (m, 1H). <sup>13</sup>C NMR (100 MHz, CDCl<sub>3</sub>): δ 159.3, 144.8, 131.8, 128.4, 114.6, 109.2, 91.9, 55.6, 50.2, 39.2, 38.5. IR (thin film): 3077, 2958, 2838, 1661, 1613, 1549, 1515, 1464, 1441, 1369, 1305, 1250, 1181, 1111, 1034 cm<sup>-1</sup>. [α]<sub>24</sub><sup>D</sup> = 113.1 (c 1.20, CHCl<sub>3</sub>). Chiral HPLC: Chiralpak AD, 1.0 mL/min, 1% *i*-PrOH in heptane, λ = 220 nm, *t*<sub>R, major</sub> = 12.2 min, *t*<sub>R, minor</sub> = 13.8 min. HRMS: calcd for (M+H<sup>+</sup>) C<sub>13</sub>H<sub>16</sub>NO<sub>3</sub> 234.1130; found 234.1124.

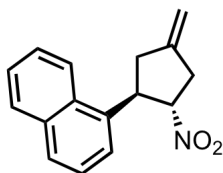

**1-((1R,2S)-4-methylene-2-nitrocyclopentyl)naphthalene (12):** The reaction was performed with 14.9 mg (0.075 mmol) of nitroalkene according to general procedure A in toluene at 23 °C and purified by flash chromatography (4% ethyl acetate in hexanes) to give the product as a clear, colorless oil (12.7 mg, 67% yield). <sup>1</sup>H NMR (400 MHz, CDCl<sub>3</sub>): δ 8.20 (d, *J* = 7.6 Hz, 1H), 7.89 (d, *J* = 6.8 Hz, 1H), 7.79 (dd, *J* = 2.0, 5.2 Hz, 1H), 7.62-7.59 (m, 1H), 7.55-7.52 (m, 1H), 7.46-7.42 (m, 2H), 5.19-5.13 (m, 3H), 4.73-4.68 (m, 1H), 3.23-3.15 (m, 2H), 3.40-2.97 (m, 1H), 2.82-2.76 (m, 1H). <sup>13</sup>C NMR (125 MHz, CDCl<sub>3</sub>): δ 146.1, 136.2, 134.3, 131.6, 129.5, 128.6, 127.1, 126.3, 125.8, 123.3, 123.2, 109.2, 90.9, 46.1, 38.2, 37.4. IR (thin film): 3050, 2923, 2853, 1660, 1598, 1546,

1433, 1399, 1367, 1320  $\text{cm}^{-1}$ .  $[\alpha]_{24}^{\text{D}} = 2.1$  (c 1.27,  $\text{CHCl}_3$ ). Chiral HPLC: Chiralcel OD, 0.8 mL/min, 10% *i*-PrOH in heptane,  $\lambda = 254$  nm,  $t_{\text{R, major}} = 10.9$  min,  $t_{\text{R, minor}} = 12.6$  min. HRMS: calcd for  $(\text{M}+\text{H}^+)$   $\text{C}_{16}\text{H}_{16}\text{NO}_2$  254.1181; found 254.1174.

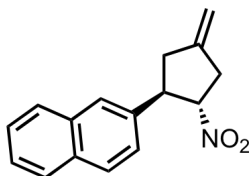

**2-((1R,2S)-4-methylene-2-nitrocyclopentyl)naphthalene (13):**

**Small Scale:** The reaction was performed with 14.9 mg (0.075 mmol) of nitroalkene according to general procedure A in toluene at 50 °C and purified by flash chromatography (4% ethyl acetate in hexanes) to give the product as a clear, colorless oil (15.5 mg, 82% yield).

**Large Scale:** A mixture of nitroalkene (300 mg, 1.5 mmol),  $\text{Pd}(\text{dba})_2$  (21.6 mg, 0.038 mmol) and ligand **L5** (48.4 mg, 0.076 mmol) was purged with argon for 15 minutes. Toluene (10 ml) was added and the solution was stirred for 2 minutes before 2-((trimethylsilyl)methyl)allyl acetate (0.45 mL, 2.4 mmol) was added. The solution was immersed in a 50 °C oil bath and stirred for 16 hours. It was then cooled, concentrated, and purified by flash chromatography (4% ethyl acetate in hexanes) to give a white solid (297 mg, 78% yield).  $^1\text{H}$  NMR (400 MHz,  $\text{CDCl}_3$ ):  $\delta$  7.85-7.76 (m, 3H), 7.67 (s, 1H), 7.51-7.44 (m, 2H), 7.25 (s, 1H), 5.13-5.01 (m, 3H), 3.99 (q,  $J = 9.2$  Hz, 1H), 3.16-3.00 (m, 3H), 2.79-2.69 (m, 1H).  $^{13}\text{C}$  NMR (100 MHz,  $\text{CDCl}_3$ ):  $\delta$  144.8, 137.2, 133.7, 133.1, 129.2, 128.1, 128.0, 126.8, 126.4, 126.3, 125.1, 109.4, 91.5, 50.9, 39.2, 38.6. IR (thin film): 3055, 2959, 2920, 1601, 1548, 1509, 1431, 1369, 1315  $\text{cm}^{-1}$ .  $[\alpha]_{25}^{\text{D}} = 107.1$  (c 1.46,  $\text{CHCl}_3$ ). Chiral HPLC: Chiralpak AD, 1.0 mL/min, 10% *i*-PrOH in heptane,  $\lambda = 220$  nm,  $t_{\text{R, major}} = 6.2$  min,  $t_{\text{R, minor}} = 7.3$  min. HRMS: calcd for  $(\text{M}+\text{H}^+)$   $\text{C}_{16}\text{H}_{16}\text{NO}_2$  254.1181; found 254.1176. MP 69-70° C.

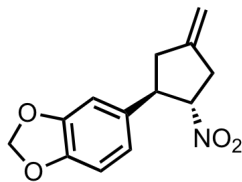

**5-((1R,2S)-4-methylene-2-nitrocyclopentyl)benzo[d][1,3]dioxole (14):** The reaction was performed with 14.5 mg (0.075 mmol) of nitroalkene according to general procedure A in toluene at 50 °C and purified by flash chromatography (4% ethyl acetate in hexanes) to give the product as a clear, colorless oil (15.0 mg, 80% yield). <sup>1</sup>H NMR (400 MHz, CDCl<sub>3</sub>): δ 6.77-6.66 (m, 3H), 5.95 (s, 2H), 5.08-5.03 (m, 2H), 4.88 (q, *J* = 8.0 Hz, 1H), 3.73 (q, *J* = 8.8 Hz, 1H), 3.06 (d, *J* = 8.4 Hz, 2H), 2.95 (dd, *J* = 8.4 Hz, 16.8 Hz, 1H), 2.62-2.52 (m, 1H). <sup>13</sup>C NMR (100 MHz, CDCl<sub>3</sub>): δ 148.4, 147.3, 144.6, 133.6, 120.8, 109.3, 108.9, 107.4, 101.5, 91.8, 50.7, 39.2, 38.5. IR (thin film): 3078, 2908, 2780, 1661, 1610, 1549, 1504, 1445, 1368, 1248, 1037 cm<sup>-1</sup>. [α]<sub>24</sub><sup>D</sup> = 108.1 (c 1.50, CHCl<sub>3</sub>). Chiral HPLC: Chiralpak AD, 1.0 mL/min, 1% *i*-PrOH in heptane, λ = 220 nm, *t*<sub>R, major</sub> = 16.6 min, *t*<sub>R, minor</sub> = 18.4 min. HRMS: calcd for (M+H<sup>+</sup>) C<sub>13</sub>H<sub>14</sub>NO<sub>4</sub> 248.0923; found 248.0917.

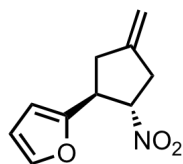

**2-((1S,2S)-4-methylene-2-nitrocyclopentyl)furan (15):** The reaction was performed with 10.4 mg (0.075 mmol) of nitroalkene according to general procedure A in toluene at 23 °C and purified by flash chromatography (4% ethyl acetate in hexanes) to give the product as a clear, colorless oil (9.5 mg, 66% yield). <sup>1</sup>H NMR (400 MHz, CDCl<sub>3</sub>): δ 7.35 (dd, *J* = 0.8, 1.9 Hz, 1H), 6.30 (dd, *J* = 1.9, 3.4 Hz, 1H), 6.14 (dt, *J* = 0.8, 3.4 Hz, 1H), 5.07-4.99 (m, 3H), 3.97-3.90 (m, 1H), 3.07-3.02 (m, 2H), 3.00-2.91 (m, 1H), 2.74-2.64 (m, 1H). <sup>13</sup>C NMR (100 MHz, CDCl<sub>3</sub>): δ 153.0, 144.3, 142.6, 110.7, 109.5, 106.8, 89.2, 44.0, 38.4, 36.4. IR (thin film): 3081, 2920, 2851, 1663, 1551, 1433, 1368, 1260, 1149, 1074, 1012 cm<sup>-1</sup>. [α]<sub>23</sub><sup>D</sup> = 69.8 (c 1.10, CHCl<sub>3</sub>). Chiral HPLC: Chiralpak AD, 1.0 mL/min, 1% *i*-PrOH in heptane, λ = 240 nm, *t*<sub>R, major</sub> = 8.5 min, *t*<sub>R, minor</sub> = 9.7 min. HRMS:

calcd for (M+Na<sup>+</sup>) C<sub>10</sub>H<sub>11</sub>NO<sub>3</sub>Na 216.0637; found 216.0640.

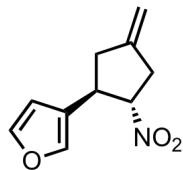

**3-((1R,2S)-4-methylene-2-nitrocyclopentyl)furan (16):** The reaction was performed with 10.4 mg (0.075 mmol) of nitroalkene according to general procedure A in toluene at 50 °C and purified by flash chromatography (3% ethyl acetate in hexanes) to give the product as a clear, colorless oil (8.3 mg, 58% yield). <sup>1</sup>H NMR (400 MHz, CDCl<sub>3</sub>): δ 7.39 (m, 1H), 7.32-7.31 (m, 1H), 6.30-6.29 (m, 1H), 5.05 (doublet of quintets, *J* = 1.8, 9.2 Hz, 2H), 4.82 (q, *J* = 6.0 Hz, 1H), 3.74 (q, *J* = 6.4 Hz, 1H), 3.07-3.03 (m, 2H), 2.97-2.91 (m, 1H), 2.55-2.48 (m, 1H). <sup>13</sup>C NMR (125 MHz, CDCl<sub>3</sub>): δ 144.5, 144.1, 139.5, 124.3, 109.4, 109.2, 91.1, 41.7, 38.3, 38.1. IR (thin film): 3146, 3079, 2920, 2851, 1549, 1432, 1369, 1159, 1026 cm<sup>-1</sup>. [α]<sub>24</sub><sup>D</sup> = 80.1 (c 1.27, CHCl<sub>3</sub>). Chiral HPLC: Chiralpak AD, 1.0 mL/min, 1% *i*-PrOH in heptane, λ = 220 nm, *t*<sub>R, major</sub> = 8.8 min, *t*<sub>R, minor</sub> = 9.6 min. HRMS: calcd for (M+H<sup>+</sup>) C<sub>10</sub>H<sub>12</sub>NO<sub>3</sub> 194.0817; found 194.0813.

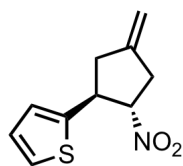

**2-((1S,2S)-4-methylene-2-nitrocyclopentyl)thiophene (17):** The reaction was performed with 11.6 mg (0.075 mmol) of nitroalkene according to general procedure A in toluene at 23 °C and purified by flash chromatography (4% ethyl acetate in hexanes) to give the product as a clear, colorless oil (11.7 mg, 75% yield). <sup>1</sup>H NMR (400 MHz, CDCl<sub>3</sub>): δ 7.21 (dd, *J* = 1.2, 5.2 Hz, 1H), 6.95 (dd, *J* = 3.4, 5.2 Hz, 1H), 6.92-6.90 (m, 1H), 5.07 (doublet of quintets, *J* = 2.16, 11.2 Hz, 2H), 4.92 (q, *J* = 7.6 Hz, 1H), 4.17-4.10 (m, 1H), 2.72-2.63 (m, 3H) 3.17-3.01 (m, 1H). <sup>13</sup>C NMR (100 MHz, CDCl<sub>3</sub>): δ 143.9, 143.1, 127.5, 125.2, 124.8, 109.7, 92.1, 45.9, 40.4, 38.5. IR (thin film): 3078, 2921, 1663, 1549, 1432, 1367, 1244 cm<sup>-1</sup>. [α]<sub>24</sub><sup>D</sup> = 88.4 (c 0.62, CHCl<sub>3</sub>). Chiral HPLC:



Chiralpak AD, 1.0 mL/min, 1% *i*-PrOH in heptane,  $\lambda = 220$  nm,  $t_{R, \text{major}} = 8.2$  min,  $t_{R, \text{minor}} = 10.5$  min. HRMS: calcd for  $(M+H^+)$   $C_{10}H_{12}NO_2S$  210.0588; found 210.0582.

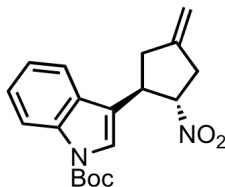

***tert*-butyl-2-((1*S*,2*S*)-4-methylene-2-nitrocyclopentyl)-1*H*-indole-1-carboxylate (18):**

The reaction was performed with 21.6 mg (0.075 mmol) of nitroalkene according to general procedure A in toluene at 50 °C and purified by flash chromatography (4% ethyl acetate in hexanes) to give the product as a clear, colorless oil (23.3 mg, 91% yield).  $^1H$  NMR (400 MHz,  $CDCl_3$ ):  $\delta$  8.12 (bs, 1H), 7.57 (d,  $J = 8.0$  Hz, 1H), 7.47 (bs, 1H), 7.37-7.32 (m, 1H), 7.29-7.25 (m, 1H), 5.14 - 5.07 (m, 3H), 4.08 (q,  $J = 8.0$  Hz, 1H), 3.19-2.99 (m, 3H), 2.78-2.70 (m, 1H), 1.67 (s, 9H).  $^{13}C$  NMR (100 MHz,  $CDCl_3$ ):  $\delta$  149.9, 145.2, 136.0, 129.3, 125.2, 123.1, 122.8, 119.8, 119.2, 115.9, 109.5, 90.2, 84.4, 42.4, 37.8, 37.6, 28.5. IR (thin film): 2979, 2931, 1733, 1550, 1453, 1372, 1309, 1256, 1156, 1089, 1019  $cm^{-1}$ .  $[\alpha]_{24}^D = 35.3$  (c 2.24,  $CHCl_3$ ). Chiral HPLC: Chiralpak IA, 1.0 mL/min, 2% ethyl acetate in hexane,  $\lambda = 254$  nm,  $t_{R, \text{major}} = 12.4$  min,  $t_{R, \text{minor}} = 15.3$  min. HRMS: calcd for  $(M+Na^+)$   $C_{19}H_{23}N_2O_4Na$  365.1478; found 365.1473.

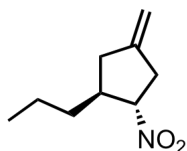

**(1*S*,2*S*)-4-methylene-1-nitro-2-propylcyclopentane (19):** The reaction was performed with 8.6 mg (0.075 mmol) of nitroalkene according to general procedure A in toluene at 50 °C and purified by flash chromatography (2% ethyl acetate in hexanes) to give the product as a clear, colorless oil (11.2 mg, 88% yield).  $^1H$  NMR (400 MHz,  $CDCl_3$ ):  $\delta$

4.94 (apparent quintet,  $J = 2.3$  Hz, 2H), 4.57 (q,  $J = 7.6$  Hz, 1H), 3.02-2.83 (m, 2H), 2.77-2.68 (m, 1H), 2.63-2.53 (m, 1H), 2.09-2.01 (m, 1H), 1.55-1.46 (m, 1H), 1.43-1.23 (m, 3H), 0.90 (t,  $J = 7.2$  Hz, 3H).  $^{13}\text{C}$  NMR (100 MHz,  $\text{CDCl}_3$ ):  $\delta$  145.5, 108.8, 90.7, 45.6, 38.3, 37.4, 35.8, 20.9, 14.3. IR (thin film): 2960, 2931, 2874, 1664, 1450, 1433, 1371  $\text{cm}^{-1}$ .  $[\alpha]_{24}^{\text{D}} = 59.4$  (c 0.38,  $\text{CHCl}_3$ ). Chiral HPLC: Chiralcel OB, 0.8 mL/min, 1% *i*-PrOH in heptane,  $\lambda = 220$  nm,  $t_{\text{R, minor}} = 6.7$  min,  $t_{\text{R, major}} = 7.2$  min. HRMS: calcd for  $(\text{M}+\text{Na}^+)$   $\text{C}_9\text{H}_{15}\text{NO}_2\text{Na}$  192.1000; found 192.0989.

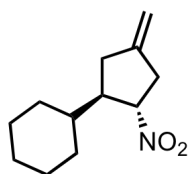

**((1R,2S)-4-methylene-2-nitrocyclopentyl)cyclohexane (20):** The reaction was performed with 11.6 mg (0.075 mmol) of nitroalkene according to general procedure A in toluene at 50 °C and purified by flash chromatography (1% ethyl acetate in hexanes) to give the product as a clear, colorless oil (15.3 mg, 97% yield).  $^1\text{H}$  NMR (400 MHz,  $\text{CDCl}_3$ ):  $\delta$  4.93 (apparent septet,  $J = 2.4$  Hz, 2H), 4.76 (q,  $J = 7.6$  Hz, 1H), 2.94-2.87 (m, 2H), 2.65 (dd,  $J = 9.2$  Hz, 15.6 Hz, 1H), 2.57-2.47 (m, 1H), 2.22-2.13 (m, 1H), 1.78-1.62 (m, 5H), 1.40-1.29 (m, 1H), 1.28-1.06 (m, 3H), 1.05-0.91 (m, 2H).  $^{13}\text{C}$  NMR (100 MHz,  $\text{CDCl}_3$ ):  $\delta$  145.8, 108.4, 88.6, 51.0, 40.9, 39.6, 35.1, 31.0, 30.2, 26.5, 26.5, 26.4. IR (thin film): 3078, 2927, 2853, 1663, 1549, 1448, 1368, 1310, 1260  $\text{cm}^{-1}$ .  $[\alpha]_{23}^{\text{D}} = 47.6$  (c 1.55,  $\text{CHCl}_3$ ). Chiral HPLC: Chiralpak IA, 1.0 mL/min, 1% THF in heptane,  $\lambda = 220$  nm,  $t_{\text{R, major}} = 11.3$  min,  $t_{\text{R, minor}} = 14.3$  min. HRMS: calcd for  $(\text{M}+\text{H}^+)$   $\text{C}_{12}\text{H}_{20}\text{NO}_2$  210.1494; found 210.1489.

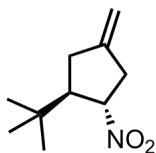

**(1R,2S)-1-tert-butyl-4-methylene-2-nitrocyclopentane (21):** The reaction was

performed with 11  $\mu\text{l}$  (0.075 mmol) of nitroalkene according to general procedure A in toluene at 50  $^{\circ}\text{C}$  and purified by flash chromatography (4% ethyl acetate in hexanes) to give the product as a clear, colorless oil (13.3 mg, 97% yield).  $^1\text{H}$  NMR (400 MHz,  $\text{CDCl}_3$ ):  $\delta$  4.95-4.89 (m, 2H), 4.85-4.78 (m, 1H), 2.91-2.86 (m, 2H), 2.68-2.56 (m, 2H), 2.33-2.20 (m, 1H), 0.91 (s, 9H).  $^{13}\text{C}$  NMR (100 MHz,  $\text{CDCl}_3$ ):  $\delta$  146.2, 108.2, 87.5, 55.3, 40.9, 33.9, 33.0, 27.4. IR (thin film): 2963, 1665, 1552, 1473, 1431, 1399, 1369  $\text{cm}^{-1}$ .  $[\alpha]_{24}^{\text{D}} = 41.9$  (c 1.00,  $\text{CHCl}_3$ ). Chiral HPLC: Chiralpak IC, 1.0 mL/min, 1% THF in heptane,  $\lambda = 220$  nm,  $t_{\text{R, major}} = 8.0$  min,  $t_{\text{R, minor}} = 8.5$  min). HRMS: calcd for  $(\text{M}+\text{H}^+)$   $\text{C}_{10}\text{H}_{18}\text{NO}_2$  184.1337; found 184.1333.

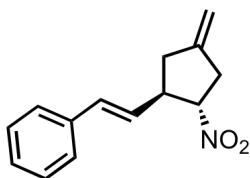

**((E)-2-((1R,2S)-4-methylene-2-nitrocyclopentyl)vinyl)benzene (22):** The reaction was performed with 13.1 mg (0.075 mmol) of nitroalkene according to general procedure A in toluene at 50  $^{\circ}\text{C}$  and purified by flash chromatography (4% ethyl acetate in hexanes) to give the product as a clear, colorless oil (11.8 mg, 53% yield).  $^1\text{H}$  NMR (400 MHz,  $\text{CDCl}_3$ ):  $\delta$  7.37-7.38 (m, 4H), 7.27-7.21 (m, 1H), 6.50 (d,  $J = 16.0$  Hz, 1H), 6.10 (dd,  $J = 8.4$  Hz, 15.6, 1H), 5.03 (apparent septet,  $J = 2.3$  Hz, 2H), 4.77 (q,  $J = 8.0$  Hz, 1H), 3.43-3.34 (m, 1H), 3.11-2.96 (m, 2H), 2.88-2.78 (m, 1H), 2.45-2.35 (m, 1H).  $^{13}\text{C}$  NMR (100 MHz,  $\text{CDCl}_3$ ):  $\delta$  144.4, 136.7, 133.0, 128.9, 128.2, 127.9, 126.7, 109.4, 90.3, 49.1, 38.1, 37.9. IR (thin film): 3027, 2913, 1662, 1549, 1493, 1432, 1369, 1320, 1256  $\text{cm}^{-1}$ .  $[\alpha]_{24}^{\text{D}} = 135.2$  (c 0.45,  $\text{CHCl}_3$ ). Chiral HPLC: Chiralpak AD, 1.0 mL/min, 10% *i*-PrOH in heptane,  $\lambda = 220$  nm,  $t_{\text{R, major}} = 5.8$  min,  $t_{\text{R, minor}} = 6.7$  min. HRMS: calcd for  $(\text{M}+\text{H}^+)$   $\text{C}_{14}\text{H}_{16}\text{NO}_2$  230.1181; found 230.1175.

### C. Synthesis of Cyclopentane Derivatives

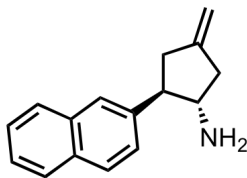

**(1S,2R)-4-methylene-2-(naphthalen-2-yl)cyclopentanamine (23):** A suspension of nitrocyclopentane (8.0 mg, 0.032 mmol) in concentrated HCl (63  $\mu$ L, 0.76 mmol) and methanol (0.32 ml) was placed in an ambient water bath. Zinc dust (84.8 mg, 1.30 mmol) was carefully added with vigorous stirring over 1 minute, and the mixture was stirred for 10 minutes. The reaction was then quenched with sat. NaHCO<sub>3</sub> (6 ml) and extracted with ethyl acetate (3 x 4 ml). The combined extracts were dried over MgSO<sub>4</sub>, concentrated and purified by flash chromatography (DCM to 5% methanol in DCM) to afford the product as a pale yellow oil (6.3 mg, 88% yield). <sup>1</sup>H NMR (400 MHz, CDCl<sub>3</sub>):  $\delta$  7.84-7.78 (m, 3H), 7.70 (m, 1H), 7.49-7.42 (m, 2H), 7.40 (dd, *J* = 1.7, 8.4 Hz, 1H), 4.97-4.93 (m, 2H), 3.47-3.39 (m, 1H), 2.94-2.82 (m, 3H), 2.70-2.60 (m, 1H), 2.32-2.23 (m, 1H). <sup>13</sup>C NMR (100 MHz, CDCl<sub>3</sub>):  $\delta$  148.1, 139.9, 133.9, 132.9, 128.7, 128.0, 127.9, 126.6, 126.5, 125.9, 125.8, 107.2, 60.0, 55.6, 42.2, 40.4. IR (thin film): 3361, 3280, 3054, 2926, 1716, 1600, 1508, 1429 cm<sup>-1</sup>. [ $\alpha$ ]<sub>24</sub><sup>D</sup> = 56.4 (c 0.91, CHCl<sub>3</sub>). Chiral HPLC (the title compound was converted into its acetamide according to standard procedures (acetyl chloride, pyridine) for analysis: Chiralpak AD, 1.0 mL/min, 10% *i*-PrOH in heptane,  $\lambda$  = 254 nm, *t*<sub>R, minor</sub> = 11.4 min, *t*<sub>R, major</sub> = 15.0 min. HRMS: calcd for (M+H<sup>+</sup>) C<sub>16</sub>H<sub>18</sub>N 224.1439; found 224.1425.

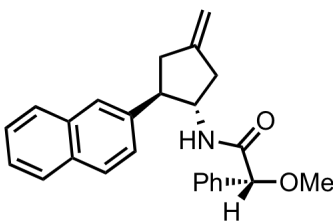

**(R)-2-methoxy-N-((1S,2R)-4-methylene-2-(naphthalen-2-yl)cyclopentyl)-phenylacetamide (24):** To a solution of aminocyclopentane (2.0 mg, 0.0090 mmol) in DCM (200  $\mu$ L) was added (*R*)-*O*-methylmandelic acid (1.7 mg, 0.010 mmol) followed by *N,N'*-dicyclohexylcarbodiimide (2.3 mg, 0.011 mmol). The mixture was stirred under

nitrogen for 1 hour, filtered, washed with DCM and concentrated. Purified by flash chromatography (20% ethyl acetate in hexanes) to yield the product as a white powder (2.5 mg, 75% yield).  $^1\text{H}$  NMR (500 MHz,  $\text{CDCl}_3$ ):  $\delta$  7.80-7.78 (m, 1H), 7.75-7.71 (m, 2H), 7.64 (m, 1H), 7.46-7.44 (m, 2H), 7.38 (dd,  $J = 1.9, 8.5$  Hz, 1H), 7.08 (dt,  $J = 1.8, 1.8, 7.5$  Hz, 1H), 6.92-6.86 (m, 4H), 6.81 (d,  $J = 9.0$  Hz, 1H), 5.02-5.00 (m, 2H), 4.62-4.55 (m, 1H), 4.51 (s, 1H), 3.28-3.22 (m, 1H), 3.26 (s, 3H), 3.07-3.01 (m, 1H), 2.94-2.88 (m, 1H), 2.66-2.59 (m, 1H), 2.40-2.34 (m, 1H).

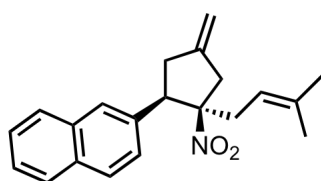

**2-((1R,2R)-2-(3-methylbut-2-enyl)-4-methylene-2-nitrocyclopentyl)naphthalene**

**(25):** To a solution of nitrocyclopentane (8.0 mg, 0.032 mmol),  $\text{Pd}_2(\text{dba})_3 \cdot \text{CHCl}_3$  (1.3 mg, 0.0016 mmol), 1,3-bis(diphenylphosphino)propane (2.0 mg, 0.0048 mmol) and  $\text{Cs}_2\text{CO}_3$  (10.4 mg, 0.032 mmol) in DMSO (0.5 ml) was added *tert*-butyl 2-methylbut-3-en-2-yl carbonate (11  $\mu\text{L}$ , 0.051 mmol) under Ar. The mixture was warmed to 50  $^\circ\text{C}$  and stirred for 5 hours. It was then cooled, quenched with water (2 ml) and extracted with diethyl ether (4 x 2 ml). The combined organics were washed with brine, dried over  $\text{MgSO}_4$  and concentrated. Purified by flash chromatography (1% ethyl acetate in hexanes) to yield the product as a clear, colorless oil that solidified on standing (7.0 mg, 68% yield).  $^1\text{H}$  NMR (400 MHz,  $\text{CDCl}_3$ ):  $\delta$  7.84-7.77 (m, 3H), 7.62-7.61 (m, 1H), 7.48-7.45 (m, 2H), 7.26 (dd,  $J = 1.9, 8.4$  Hz, 1H), 5.14-5.10 (m, 2H), 5.07-5.02 (m, 1H), 3.59 (dd,  $J = 8.0, 9.6$  Hz, 1H), 3.43 (bd,  $J = 18.0$  Hz, 1H), 3.21-3.13 (m, 1H), 3.03 (dd,  $J = 6.8, 15.2$  Hz, 1H), 2.92-2.84 (m, 1H), 2.76 (dq,  $J = 2.2, 18.0$  Hz, 1H), 2.57 (dd,  $J = 7.6, 14.8$  Hz, 1H), 1.72 (s, 3H), 3.64 (s, 3H).  $^{13}\text{C}$  NMR (100 MHz,  $\text{CDCl}_3$ ):  $\delta$  146.4, 137.5, 135.0, 133.6, 133.3, 128.5, 128.3, 127.9, 127.6, 126.5, 126.4, 126.1, 117.4, 108.5, 100.6, 55.2, 41.2, 37.6, 35.9, 26.4, 18.6. IR (thin film): 3057, 2926, 1662, 1601, 1537, 1434, 1354  $\text{cm}^{-1}$ .  $[\alpha]_{24}^{\text{D}} = -47.8$  (c 0.61,  $\text{CHCl}_3$ ). Chiral HPLC: Chiralpak AD, 1.0 mL/min, 1.0% *i*-PrOH in heptane,

$\lambda = 254 \text{ nm}$ ,  $t_{R, \text{major}} = 8.8 \text{ min}$ ,  $t_{R, \text{minor}} = 11.2 \text{ min}$ . HRMS: calcd for  $(M+H^+)$   $C_{21}H_{24}NO_2$  322.1807; found 322.1796. MP 90-92 °C.

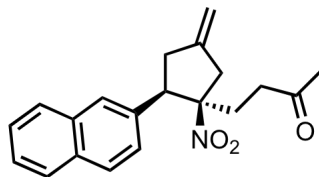

**4-((1R,2R)-4-methylene-2-(naphthalen-2-yl)-1-nitrocyclopentyl)butan-2-one (26):**

To a solution of nitrocyclopentane (40.0 mg, 0.16 mmol) in acetonitrile (2.5 ml) was added DBU (24  $\mu\text{L}$ , 0.16 mmol) and 3-buten-2-one (13.4  $\mu\text{L}$ , 0.16 mmol). The pale yellow solution was stirred at room temperature for 30 minutes, concentrated and purified by flash chromatography (15% ethyl acetate in hexanes) to yield a white solid (43.6 mg, 84% yield).  $^1\text{H}$  NMR (400 MHz,  $\text{CDCl}_3$ ):  $\delta$  7.82-7.77 (m, 3H), 7.62 (bd,  $J = 1.6 \text{ Hz}$ , 1H), 7.50-7.44 (m, 2H), 7.25 (dd,  $J = 2.0, 8.4 \text{ Hz}$ , 1H), 5.15-5.13 (m, 1H), 5.11-5.08 (m, 1H), 3.55 (dd,  $J = 7.6, 11.2 \text{ Hz}$ , 1H), 3.42 (bd,  $J = 18.0 \text{ Hz}$ , 1H), 3.25-3.16 (m, 1H), 2.90-2.82 (m, 1H), 2.72-2.66 (m, 1H), 2.65-2.59 (m, 1H) 2.54-2.35 (m, 2H), 2.17-2.09 (m, 1H), 2.13 (s, 3H).  $^{13}\text{C}$  NMR (100 MHz,  $\text{CDCl}_3$ ):  $\delta$  206.9, 145.7, 134.0, 133.5, 133.4, 128.6, 128.3, 127.9, 127.6, 126.6, 126.5, 125.8, 108.6, 100.2, 56.8, 41.9, 39.2, 37.4, 31.2, 30.4. IR (thin film): 3058, 2918, 2849, 1716, 1535, 1435, 1355  $\text{cm}^{-1}$ .  $[\alpha]_{24}^D = -68.2$  (c 1.11,  $\text{CHCl}_3$ ). Chiral HPLC: Chiralcel OD, 0.8 mL/min, 10% *i*-PrOH in heptane,  $\lambda = 254 \text{ nm}$ ,  $t_{R, \text{minor}} = 16.9 \text{ min}$ ,  $t_{R, \text{major}} = 17.9 \text{ min}$ . HRMS: calcd for  $(M+H^+)$   $C_{20}H_{22}NO_3$  324.1599; found 324.1585. MP 119-121 °C.

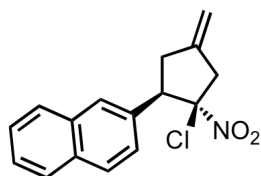

**2-((1R,2R)-2-chloro-4-methylene-2-nitrocyclopentyl)naphthalene (27):** To a solution of nitrocyclopentane (8.0 mg, 0.032 mmol) in DCM (0.5 ml) at 0 °C was added DBU (5.7  $\mu\text{L}$ , 0.038 mmol) and TMSCl (8.1  $\mu\text{L}$ , 0.064 mmol) and the reaction was stirred

for 30 minutes. *m*-Chloroperoxybenzoic acid (7.7 mg, 0.045 mmol) in DCM (0.1 ml) was added dropwise over 1 minute, the solution was stirred at 0 °C for 60 minutes, then quenched with sat. Na<sub>2</sub>SO<sub>3</sub> (2 ml). The layers were separated, and the organics were washed with 1 M HCl (2 ml), sat. NaHCO<sub>3</sub> (2 ml), water (2 ml) and dried over MgSO<sub>4</sub>. The solution was concentrated and purified by flash chromatography (3% ethyl acetate in hexanes) to yield the product as a white solid (5.9 mg, 64% yield). <sup>1</sup>H NMR (400 MHz, CDCl<sub>3</sub>): δ 7.75-7.71 (m, 3H), 7.63 (d, *J* = 1.5 Hz, 1H), 7.43-7.38 (m, 2H), 7.29 (dd, *J* = 1.9, 8.6 Hz, 1H), 5.15 (quintet, *J* = 2.2 Hz, 1H), 5.11 (quintet, *J* = 2.2 Hz, 1H), 4.00 (t, *J* = 8.7 Hz, 1H), 3.85-3.78 (m, 1H), 3.25-3.16 (m, 2H), 3.08-2.99 (m, 1H). <sup>13</sup>C NMR (100 MHz, CDCl<sub>3</sub>): δ 143.4, 133.6, 133.5, 132.5, 128.8, 128.5, 127.9, 127.9, 126.8, 126.7, 125.8, 110.1, 110.0, 58.9, 48.2, 37.2. IR (thin film): 3058, 2927, 1665, 1556, 1433, 1348, 1274 cm<sup>-1</sup>. [α]<sub>24</sub><sup>D</sup> = -34.8 (c 0.60, CHCl<sub>3</sub>). Chiral HPLC: Chiralpak AD, 1.0 mL/min, 1% *i*-PrOH in heptane, λ = 254 nm, t<sub>R, major</sub> = 9.0 min, t<sub>R, minor</sub> = 11.5 min. HRMS: calcd for (M<sup>+</sup>) C<sub>16</sub>H<sub>14</sub>ClNO<sub>2</sub> 287.0713; found 287.0699. MP 104-105 °C.

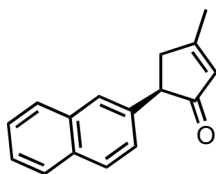

**(*R*)-3-methyl-5-(naphthalen-2-yl)cyclopent-2-enone (28):** To a solution of nitrocyclopentane (14.9 mg, 0.06 mmol) in THF (0.6 ml) at 0 °C was added KO*t*-Bu (66 μl, 1 M in THF, 0.066 mmol) and the yellow solution was stirred for 15 minutes at 0 °C. It was then cooled to approximately -20 °C and dimethyldioxirane (0.7 ml, approx. 1 M in acetone, 0.07 mmol) was added. The mixture was stirred for 5 minutes and then added to a well-stirred solution of 0.25 M, pH 7.0 phosphate buffer (5 ml) and extracted with DCM (3 x 3 ml). The combined organics were dried over MgSO<sub>4</sub>, concentrated and purified by flash chromatography (20% ethyl acetate in hexanes) to yield the product as a pale yellow solid (11.3 mg, 86% yield). <sup>1</sup>H NMR (400 MHz, CDCl<sub>3</sub>): δ 7.81-7.76 (m, 3H), 7.63 (bs, 1H), 7.48-7.41 (m, 2H), 7.21 (dd, *J* = 1.8, 8.5 Hz, 1H), 6.09-6.06 (m, 1H),

3.79 (dd,  $J = 2.8, 7.2$  Hz, 1H), 3.18 (ddq,  $J = 0.8, 0.8, 0.8, 7.2, 18.8$  Hz, 1H), 2.80-2.74 (m, 1H), 2.24 (s, 3H).  $^{13}\text{C}$  NMR (100 MHz,  $\text{CDCl}_3$ ):  $\delta$  209.4, 178.4, 137.5, 133.8, 132.8, 130.2, 129.0, 128.0, 127.9, 127.0, 126.5, 126.0, 125.7, 53.1, 43.1, 19.8. IR (thin film): 2923, 2852, 1696, 1622  $\text{cm}^{-1}$ .  $[\alpha]_{24}^D = -107.6$  (c 1.34,  $\text{CHCl}_3$ ). Chiral HPLC: Chiralpak AD-H, 0.8 mL/min, 10% *i*-PrOH in heptane,  $\lambda = 254$  nm,  $t_{R, \text{major}} = 14.8$  min,  $t_{R, \text{minor}} = 17.1$  min. HRMS: calcd for  $(\text{M}+\text{H}^+)$   $\text{C}_{16}\text{H}_{15}\text{O}$  223.1123; found 223.1113. MP 71-72  $^\circ\text{C}$ .

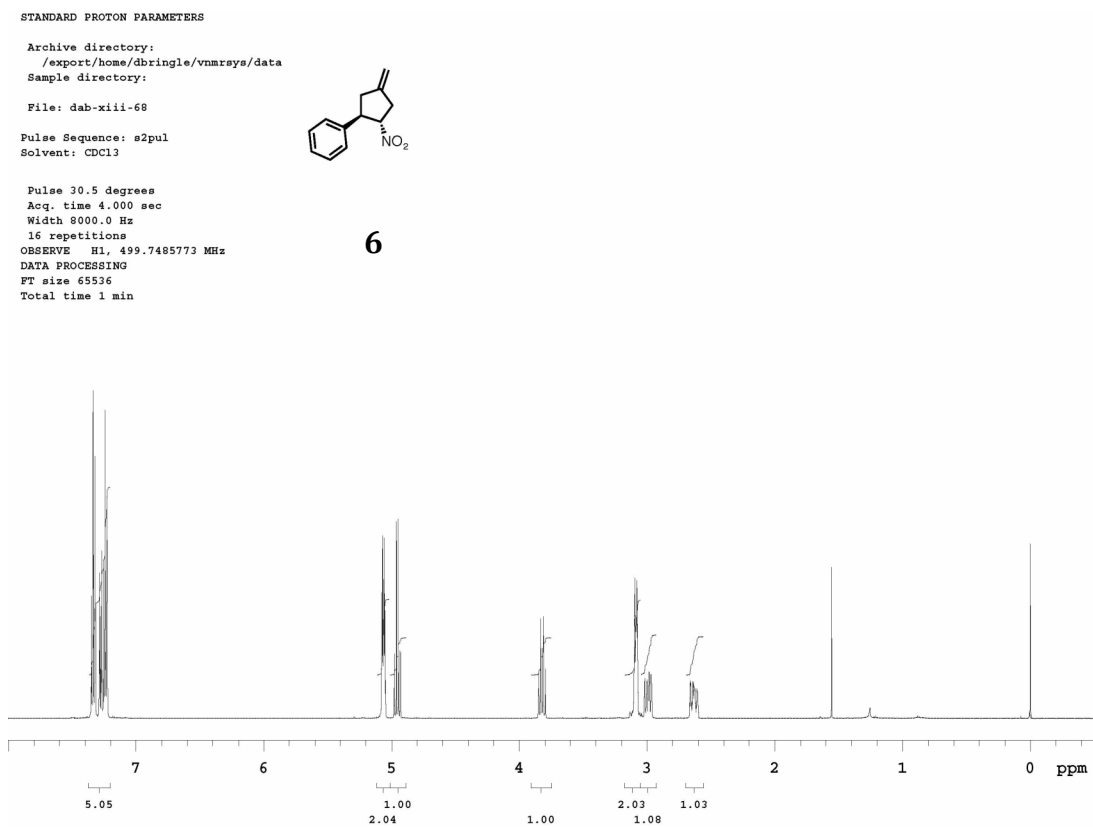



C13par

Archive directory:  
/export/home/dbringle/vnmrsys/data  
Sample directory:

File: dab-xiii-68C13

Pulse Sequence: s2pul  
Solvent: CDCl3  
User: 1-15-87

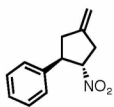

6

Relax. delay 0.500 sec  
Pulse 38.3 degrees  
Acq. time 1.500 sec  
Width 33003.3 Hz  
80 repetitions  
OBSERVE C13, 125.6618455 MHz  
DECOUPLE H1, 499.7505605 MHz  
Power 43 dB  
continuously on  
WALTZ-16 modulated  
DATA PROCESSING  
Line broadening 2.0 Hz  
FT size 131072  
Total time 34 min

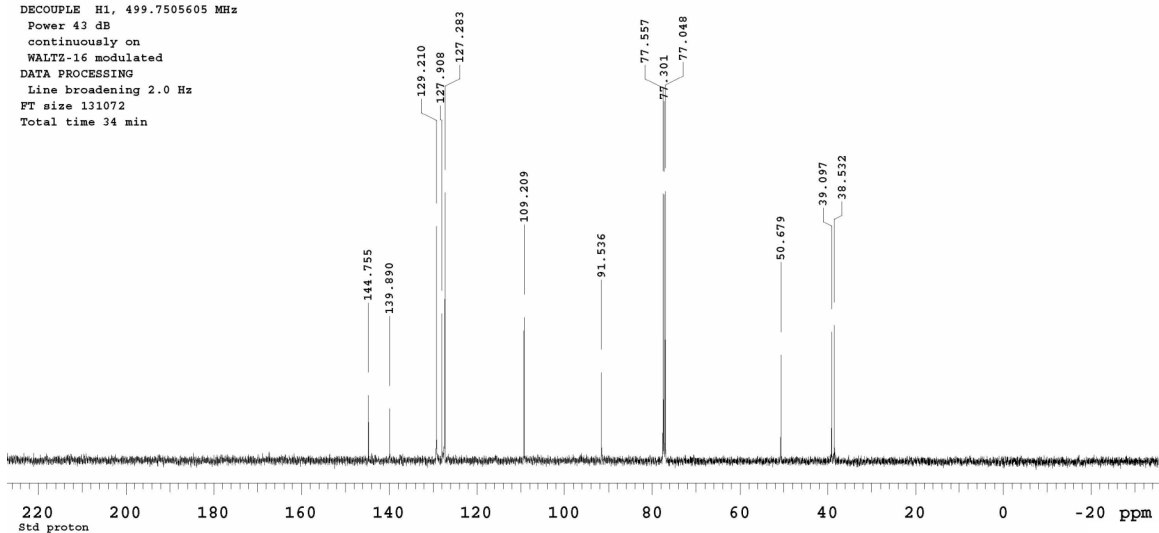

Archive directory:

Sample directory:

File: dab-v-22

Pulse Sequence: s2pul  
Solvent: cdcl3

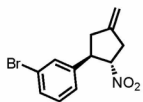

7

Relax. delay 0.500 sec  
Pulse 45.0 degrees  
Acq. time 4.000 sec  
Width 5605.4 Hz  
16 repetitions  
OBSERVE H1, 399.7291438 MHz  
DATA PROCESSING  
FT size 65536  
Total time 1 min

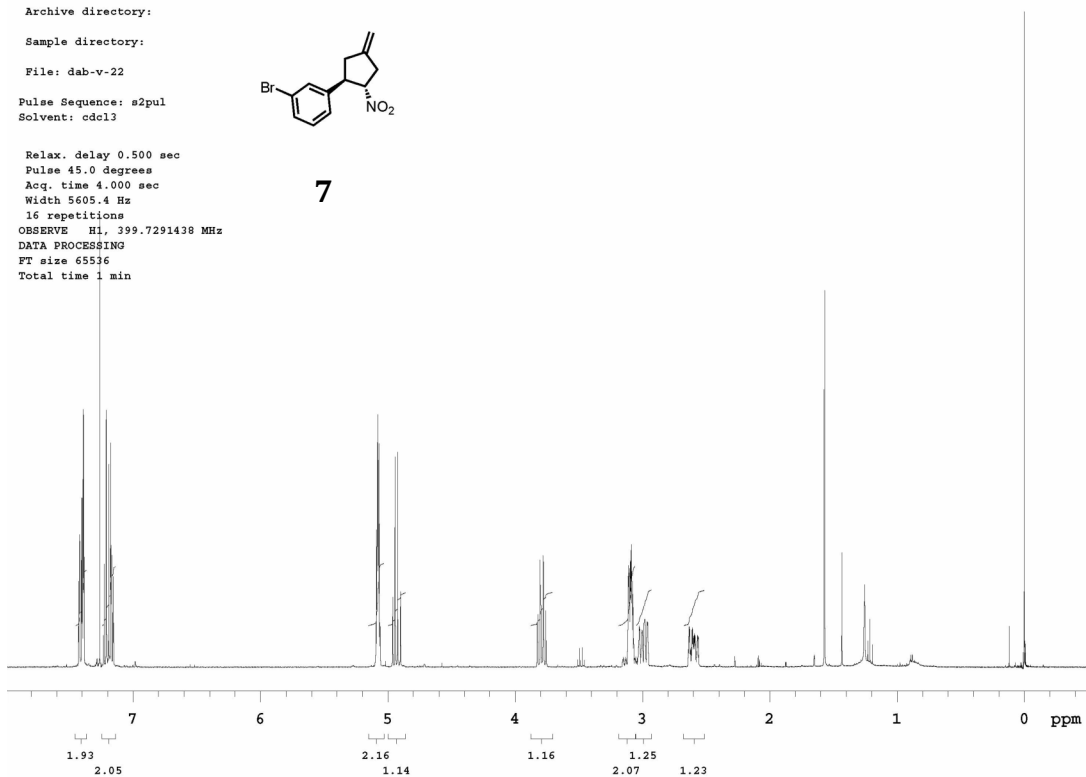

Std proton

Archive directory:

Sample directory:

File: dab-v-22C13

Pulse Sequence: s2pul

Solvent: cdcl3

User: 1-14-87

Relax. delay 1.000 sec  
Pulse 40.0 degrees  
Acq. time 1.300 sec  
Width 24509.8 Hz  
512 repetitions  
OBSERVE C13, 100.5119396 MHz  
DECOUPLE H1, 399.7311439 MHz  
Power 43 dB  
continuously on  
WALTZ-16 modulated  
DATA PROCESSING  
Line broadening 0.5 Hz  
FT size 65536  
Total time 19 min

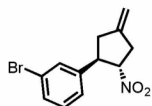

7

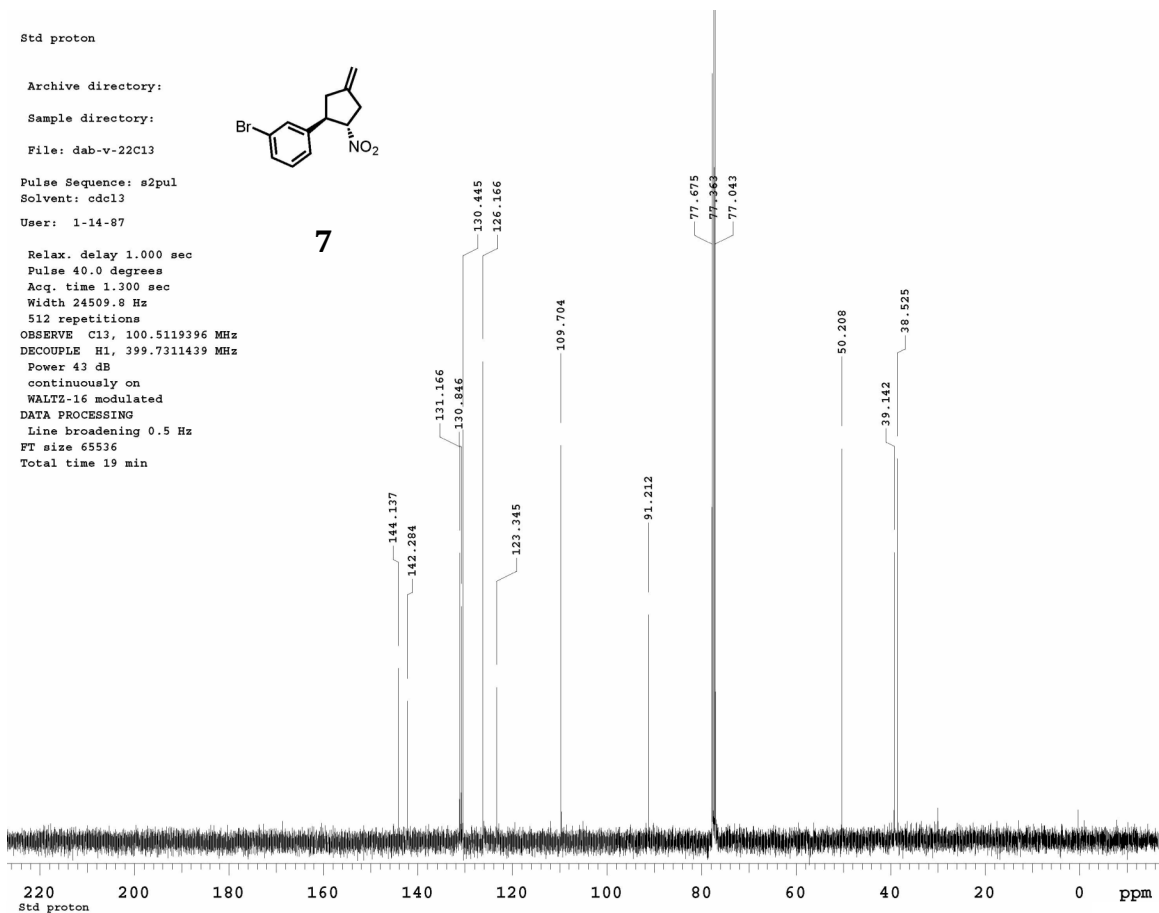

Archive directory:

Sample directory:

File: dab-xv-82

Pulse Sequence: s2pul

Solvent: cdcl3

Temp. 23.0 C / 296.1 K

Relax. delay 0.500 sec

Pulse 45.0 degrees

Acq. time 4.000 sec

Width 5605.4 Hz

4 repetitions

OBSERVE H1, 399.7345515 MHz

DATA PROCESSING

FT size 65536

Total time 1 min

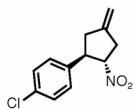

8

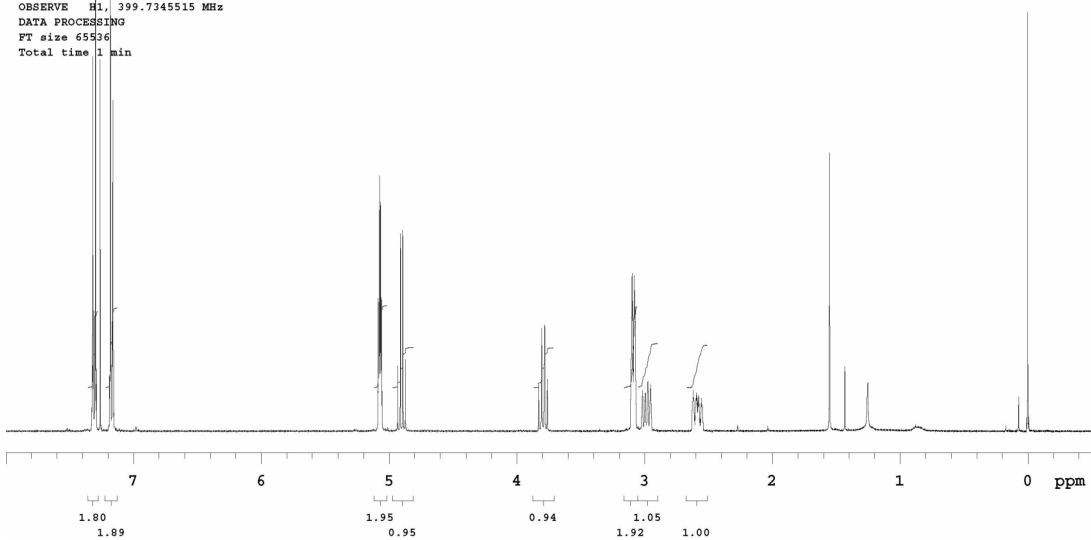

Std proton

Archive directory:

Sample directory:

File: dab-xv-82C13

Pulse Sequence: s2pul  
Solvent: cdcl3

Temp. 23.0 C / 296.1 K  
User: 1-14-87

Relax. delay 1.000 sec  
Pulse 39.5 degrees  
Acq. time 1.300 sec  
Width 24509.8 Hz  
176 repetitions  
OBSERVE C13, 100.5132975 MHz  
DECOUPLE H1, 399.7365548 MHz  
Power 43 dB  
continuously on  
WALTZ-16 modulated  
DATA PROCESSING  
Line broadening 0.5 Hz  
FT size 65536  
Total time 39 min

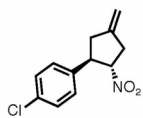

8

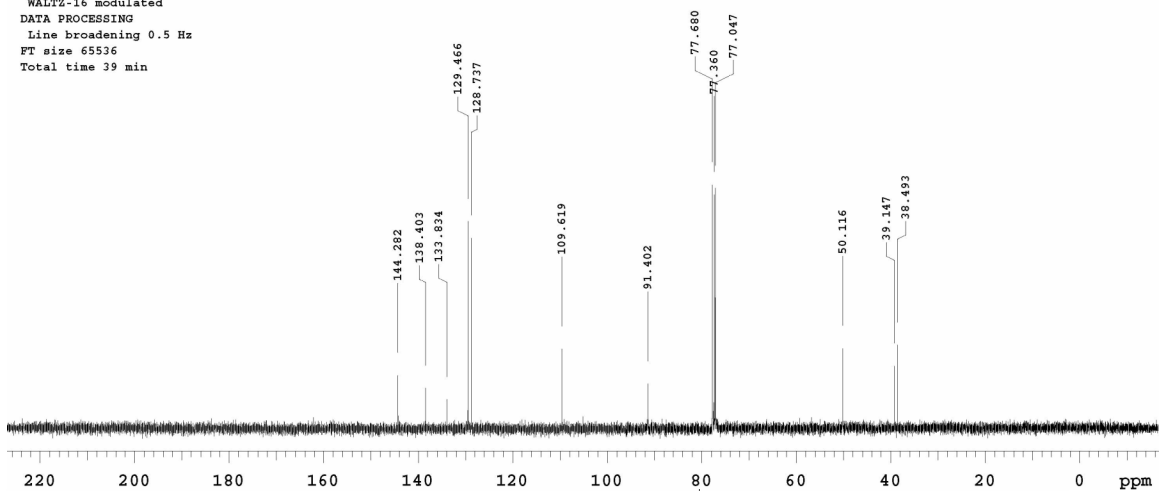

Std proton

Archive directory:

Sample directory:

File: pss-i-15-1

Pulse Sequence: s2pul  
Solvent: cdcl3

Relax. delay 0.500 sec  
Pulse 45.0 degrees  
Acq. time 4.000 sec  
Width 5605.4 Hz  
16 repetitions  
OBSERVE H1, 399.7291476 MHz  
DATA PROCESSING  
FT size 65536  
Total time 1 min

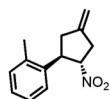

9

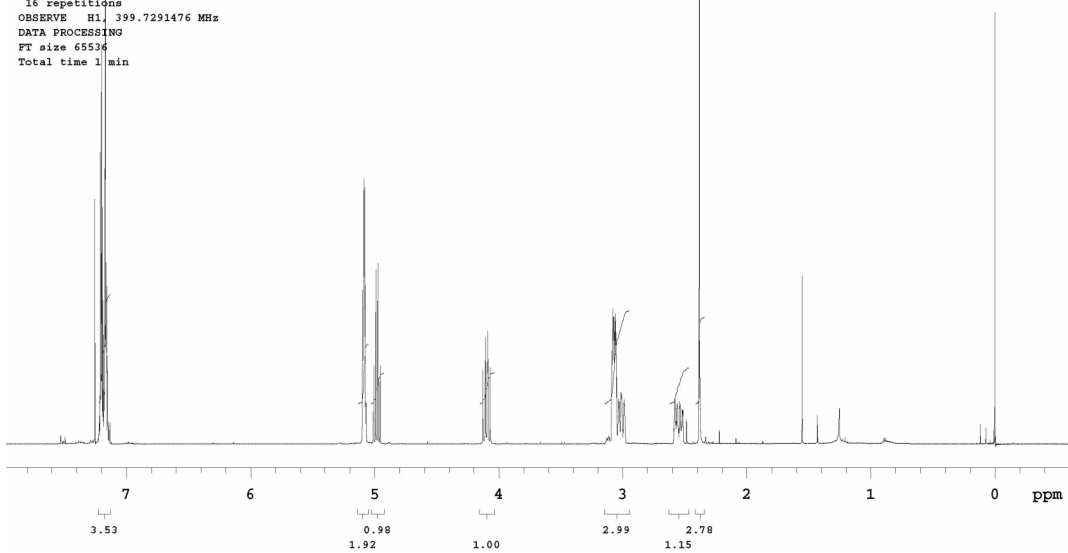

Std proton

Archive directory:

Sample directory:

File: pss-i-15-1c13

Pulse Sequence: s2pul

Solvent: cdcl3

User: 1-14-87

Relax. delay 1.000 sec  
Pulse 40.0 degrees  
Acq. time 1.300 sec  
Width 24509.8 Hz  
296 repetitions  
OBSERVE C13, 100.5119414 MHz  
DECOUPLE H1, 399.7311439 MHz  
Power 43 dB  
continuously on  
WALTZ-16 modulated  
DATA PROCESSING  
Line broadening 0.5 Hz  
FT size 65536  
Total time 19 min

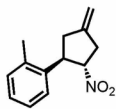

9

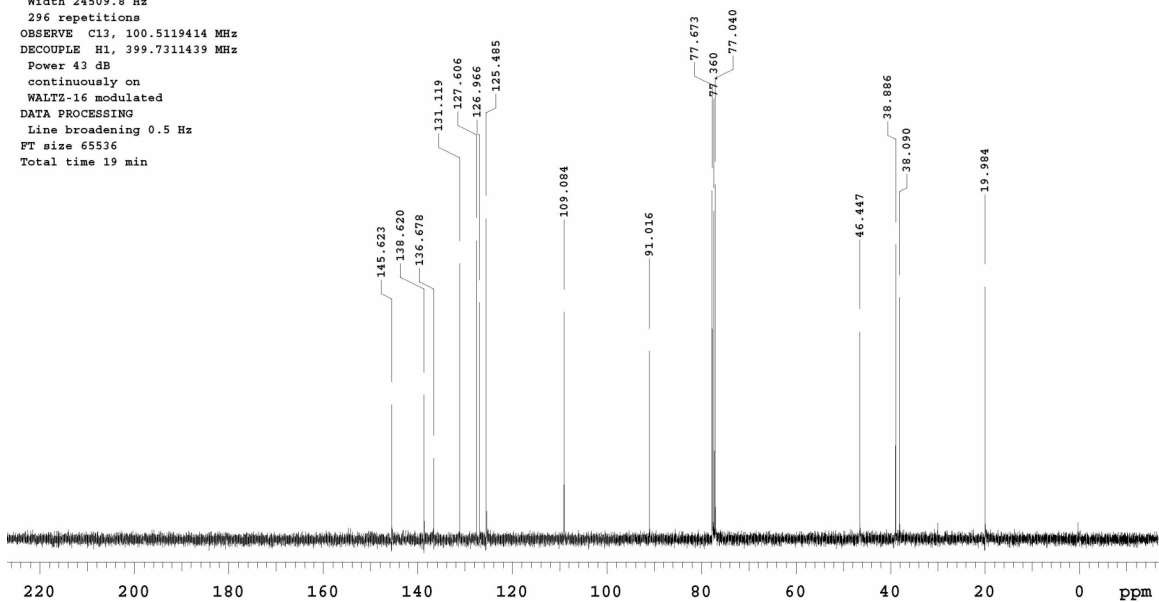

Std proton  
 Archive directory:  
 Sample directory:  
 File: pss-i-17-1  
 Pulse Sequence: s2pul  
 Solvent: cdcl3  
 Relax. delay 0.500 sec  
 Pulse 45.0 degrees  
 Acq. time 4.000 sec  
 Width 5605.4 Hz  
 16 repetitions  
 OBSERVE H1, 399.7291471 MHz  
 DATA PROCESSING  
 FT size 65536  
 Total time 1 min

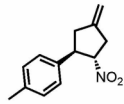

**10**

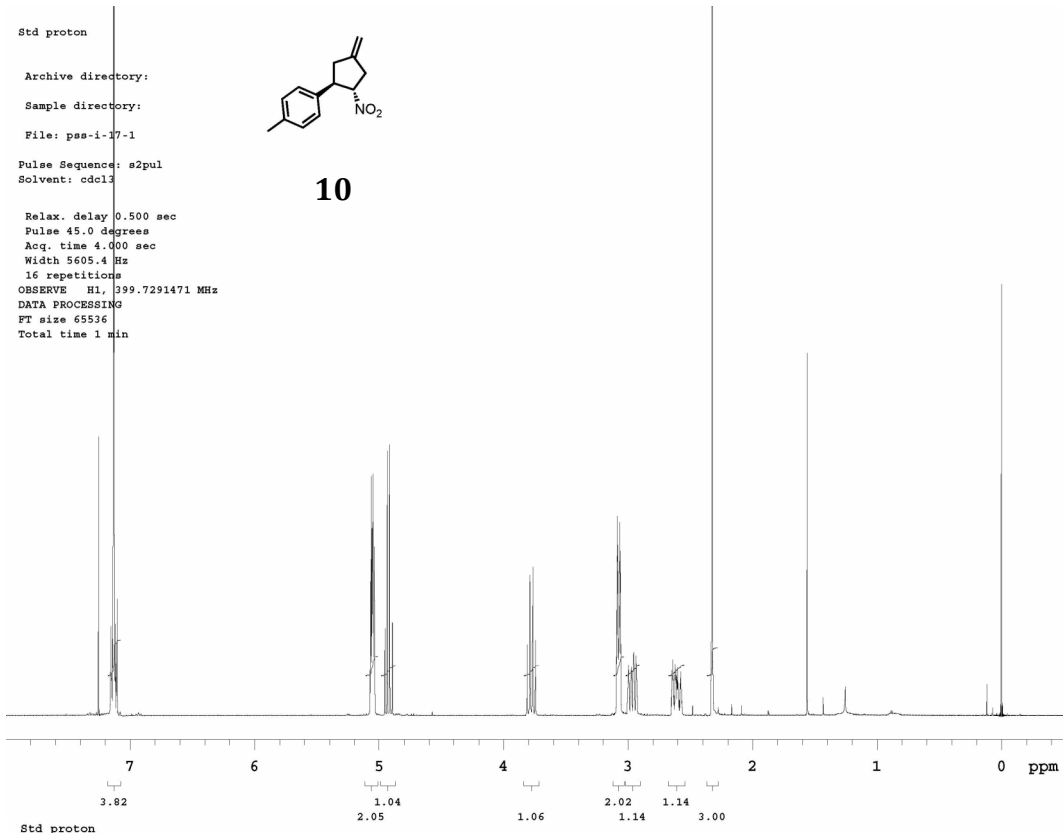

Archive directory:  
 Sample directory:  
 File: pss-i-17-1c13  
 Pulse Sequence: s2pul  
 Solvent: cdcl3  
 User: 1-14-87  
 Relax. delay 1.000 sec  
 Pulse 40.0 degrees  
 Acq. time 1.300 sec  
 Width 24509.8 Hz  
 468 repetitions  
 OBSERVE C13, 100.5119406 MHz  
 DECOUPLE H1, 399.7311439 MHz  
 Power 43 dB  
 continuously on  
 WALTZ-16 modulated  
 DATA PROCESSING  
 Line broadening 0.5 Hz  
 FT size 65536  
 Total time 19 min

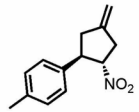

**10**

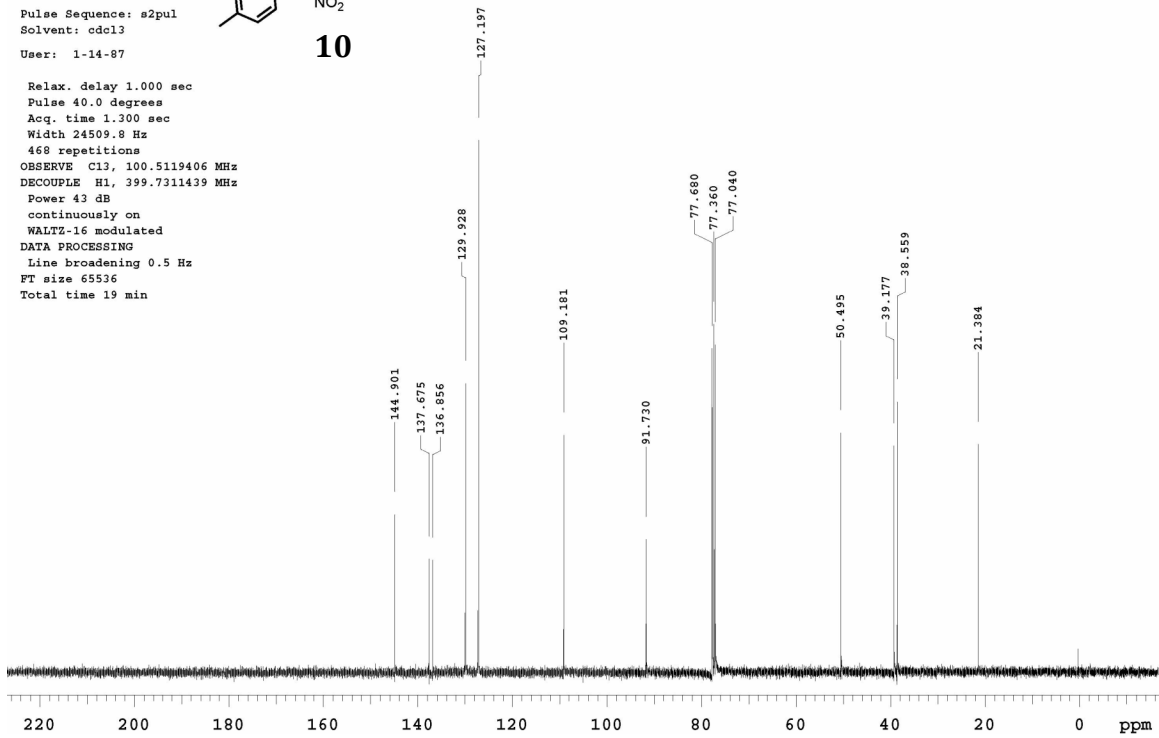

Std proton

Archive directory:

Sample directory:

File: pss-i-54-1

Pulse Sequence: s2pul

Solvent: cdcl3

Temp. 20.0 C / 293.1 K

Relax. delay 0.500 sec

Pulse 45.0 degrees

Acq. time 4.000 sec

Width 5605.4 Hz

16 repetitions

OBSERVE H1, 399.7291450 MHz

DATA PROCESSING

FT size 65536

Total time 1 min

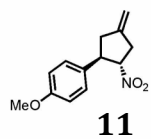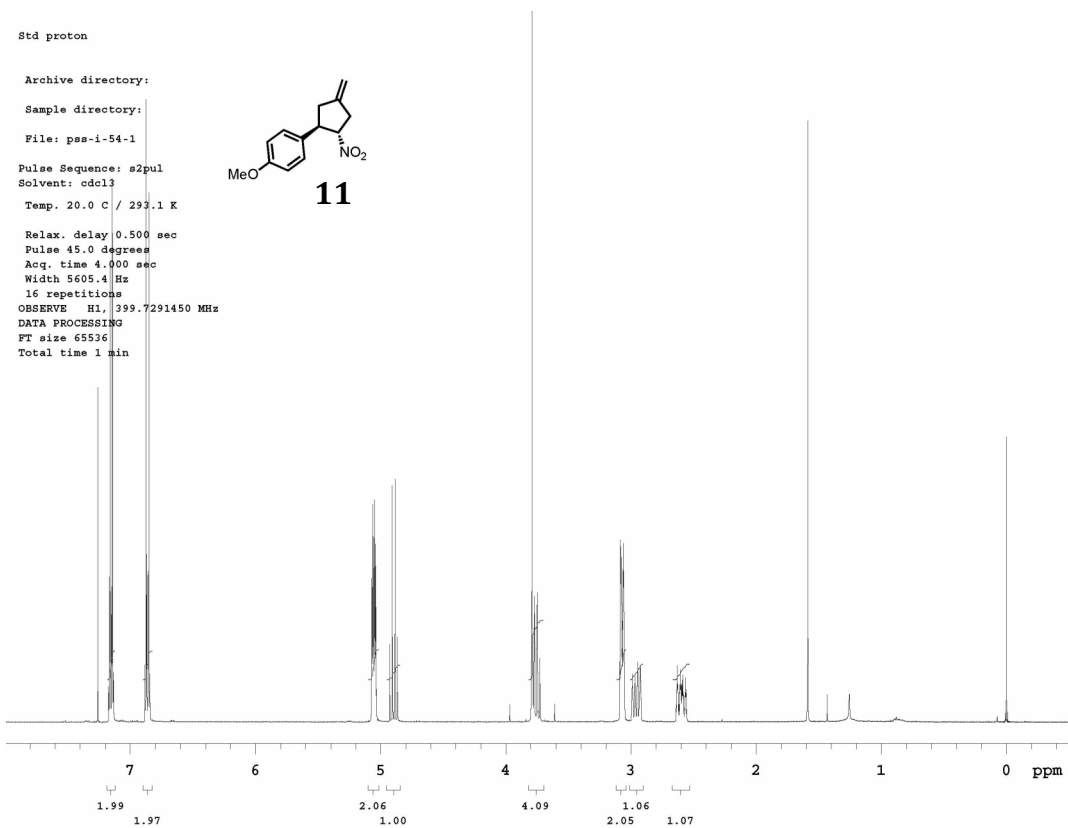

Std proton

Archive directory:

Sample directory:

File: pss-i-54-1c13

Pulse Sequence: s2pul

Solvent: cdcl3

Temp. 20.0 C / 293.1 K

User: 1-14-87

Relax. delay 1.000 sec

Pulse 40.0 degrees

Acq. time 1.300 sec

Width 24509.8 Hz

404 repetitions

OBSERVE C13, 100.5119406 MHz

DECOUPLE H1, 399.7311439 MHz

Power 43 dB

continuously on

WALTZ-16 modulated

DATA PROCESSING

Line broadening 0.5 Hz

FT size 65536

Total time 19 min

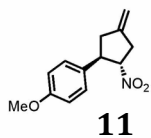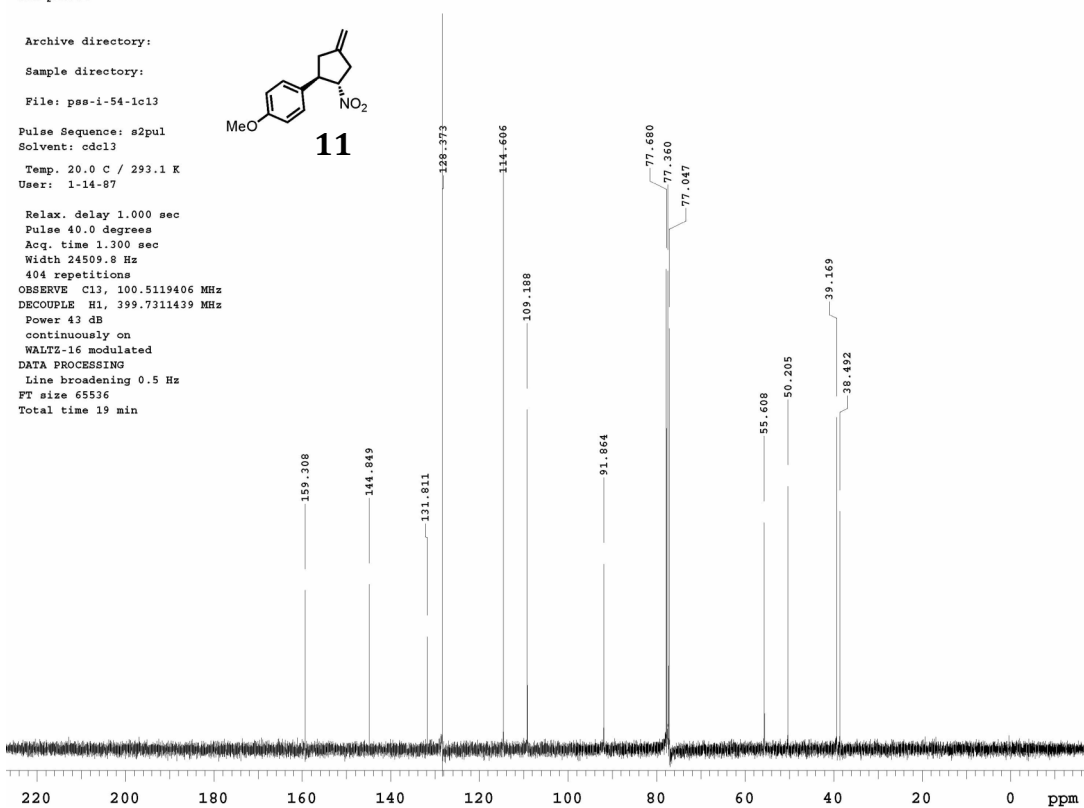

Std proton

Archive directory:

Sample directory:

File: pss-i-62-proton

Pulse Sequence: s2pul  
Solvent: cdcl3  
Temp. 20.0 C / 293.1 K

Relax. delay 0.500 sec  
Pulse 45.0 degrees  
Acq. time 4.000 sec  
Width 5605.4 Hz  
16 repetitions  
OBSERVE H1, 399.7291450 MHz  
DATA PROCESSING  
FT size 65536  
Total time 1 min

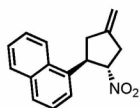

12

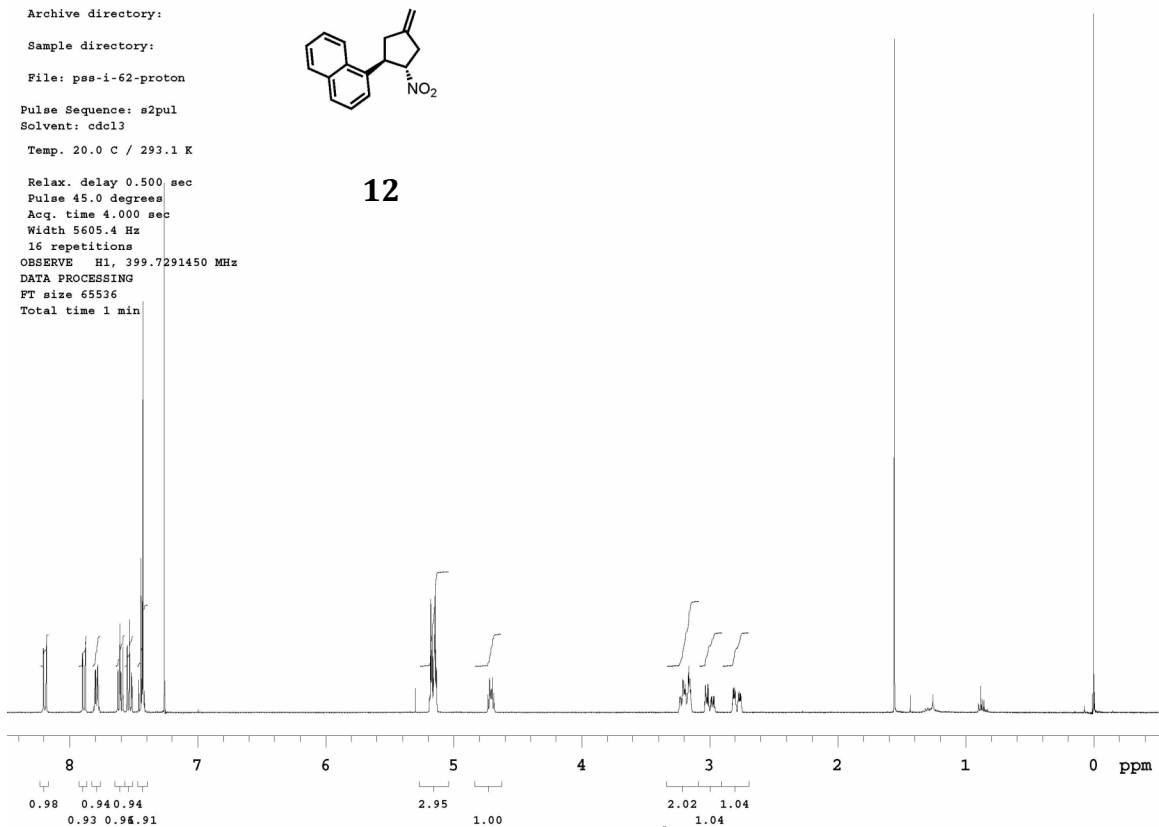

C13par

Archive directory:  
/export/home/dbringle/vnmrsys/data  
Sample directory:

File: pss-i-7C13

Pulse Sequence: s2pul  
Solvent: CDCl3  
User: 1-15-87

Relax. delay 0.500 sec  
Pulse 37.8 degrees  
Acq. time 1.500 sec  
Width 33003.3 Hz  
568 repetitions  
OBSERVE C13, 125.6618366 MHz  
DECOUPLE H1, 499.7505605 MHz  
Power 43 dB  
continuously on  
WALTZ-16 modulated  
DATA PROCESSING  
Line broadening 2.0 Hz  
FT size 131072  
Total time 34 min

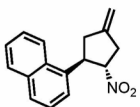

12

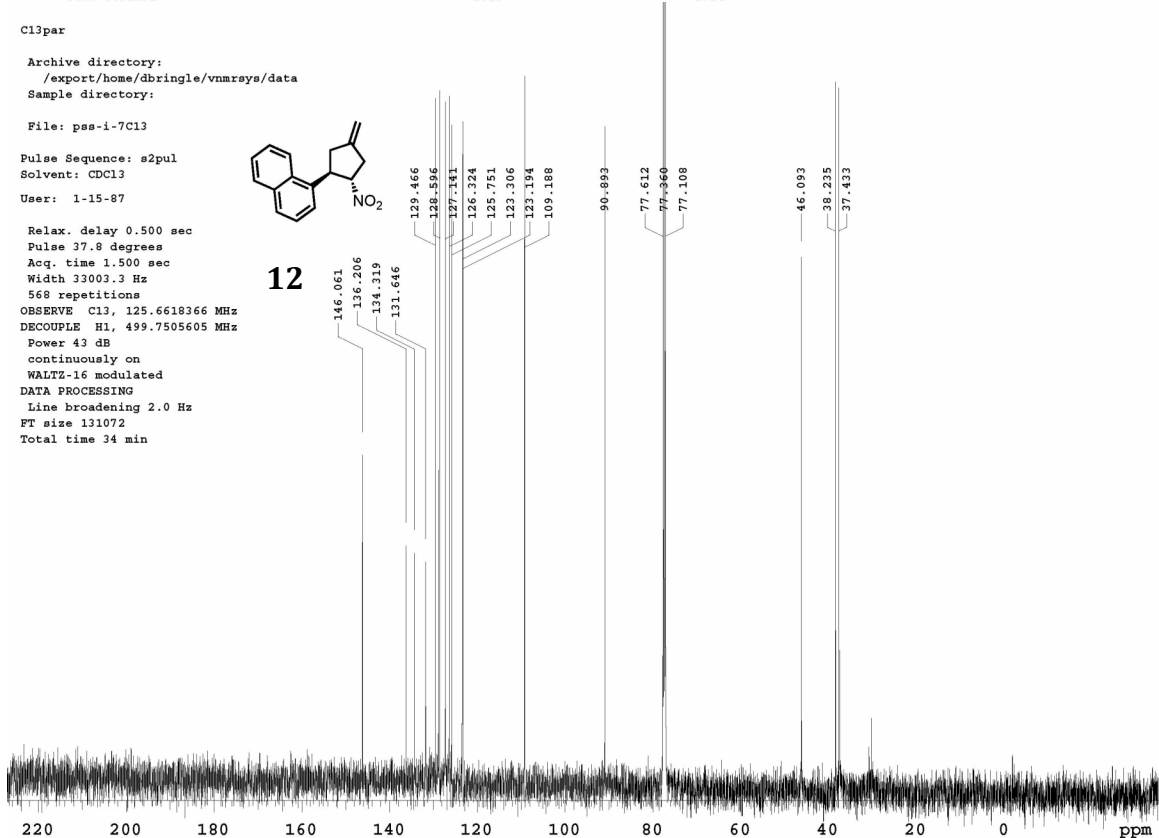

Std proton

Archive directory:  
Sample directory:  
File: pss-i-40-1  
Pulse Sequence: s2pul  
Solvent: cdcl3  
Temp. 20.0 C / 293.1 K

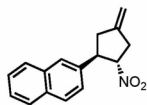

13

Relax. delay 0.500 sec  
Pulse 45.0 degrees  
Acq. time 4.000 sec  
Width 5605.4 Hz  
16 repetitions  
OBSERVE H1, 399.7291498 MHz  
DATA PROCESSING  
FT size 65536  
Total time 1 min

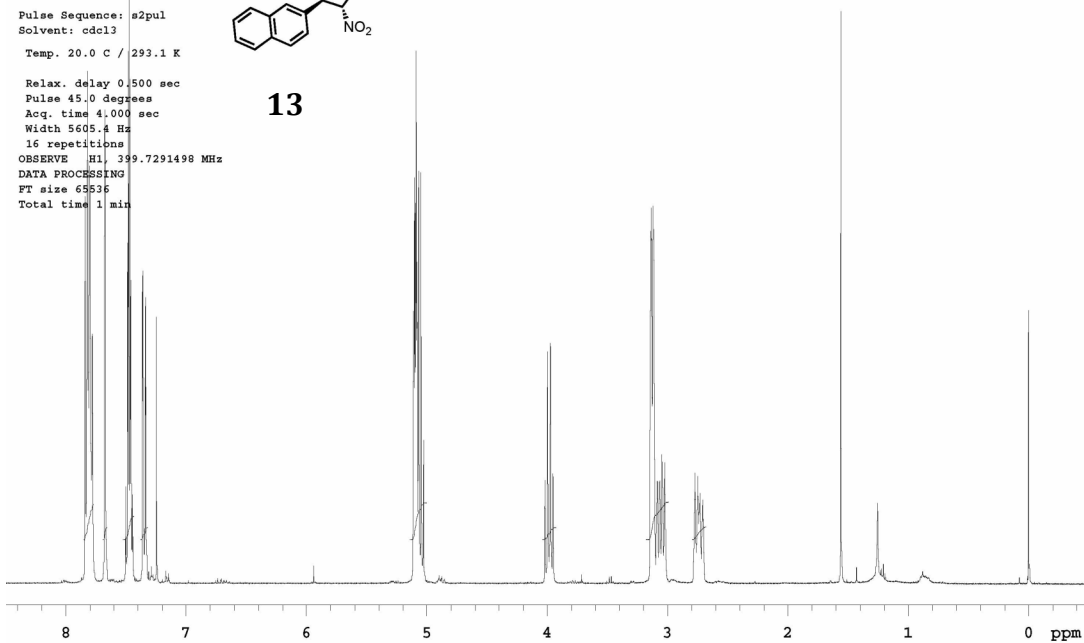

Std proton

Archive directory:  
Sample directory:  
File: pss-i-40-1c13  
Pulse Sequence: s2pul  
Solvent: cdcl3  
Temp. 20.0 C / 293.1 K  
User: 1-14-87

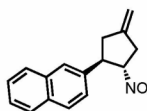

13

Relax. delay 1.000 sec  
Pulse 40.0 degrees  
Acq. time 1.300 sec  
Width 24509.8 Hz  
404 repetitions  
OBSERVE C13, 100.5119421 MHz  
DECOUPLE H1, 399.7311439 MHz  
Power 43 dB  
continuously on  
WALTZ-16 modulated  
DATA PROCESSING  
Line broadening 0.5 Hz  
FT size 65536  
Total time 19 min

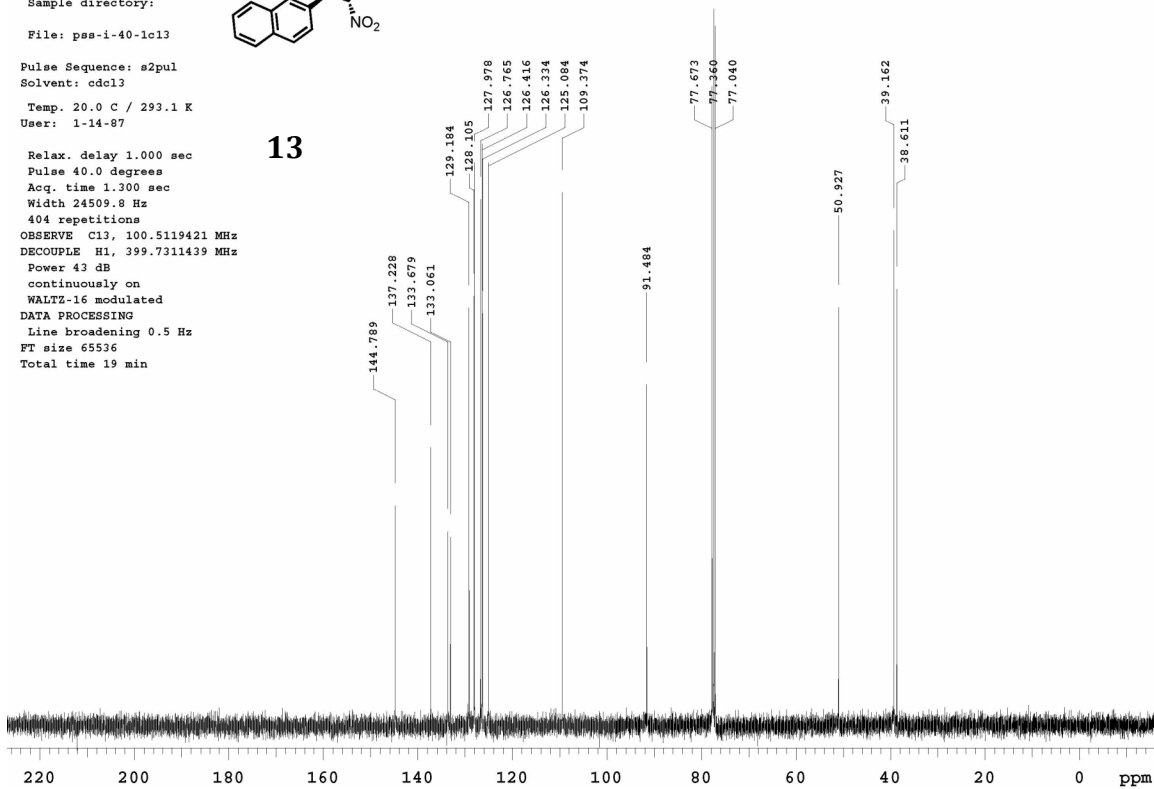



Std proton

Archive directory:  
Sample directory:  
File: pss-i-39-1  
Pulse Sequence: s2pul  
Solvent: cdcl3  
Temp. 20.0 C / 293.1 K

Relax. delay 0.500 sec  
Pulse 45.0 degrees  
Acq. time 4.000 sec  
Width 5605.4 Hz  
16 repetitions  
OBSERVE H1, 399.7291438 MHz  
DATA PROCESSING  
FT size 65536  
Total time 1 min

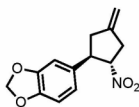

14

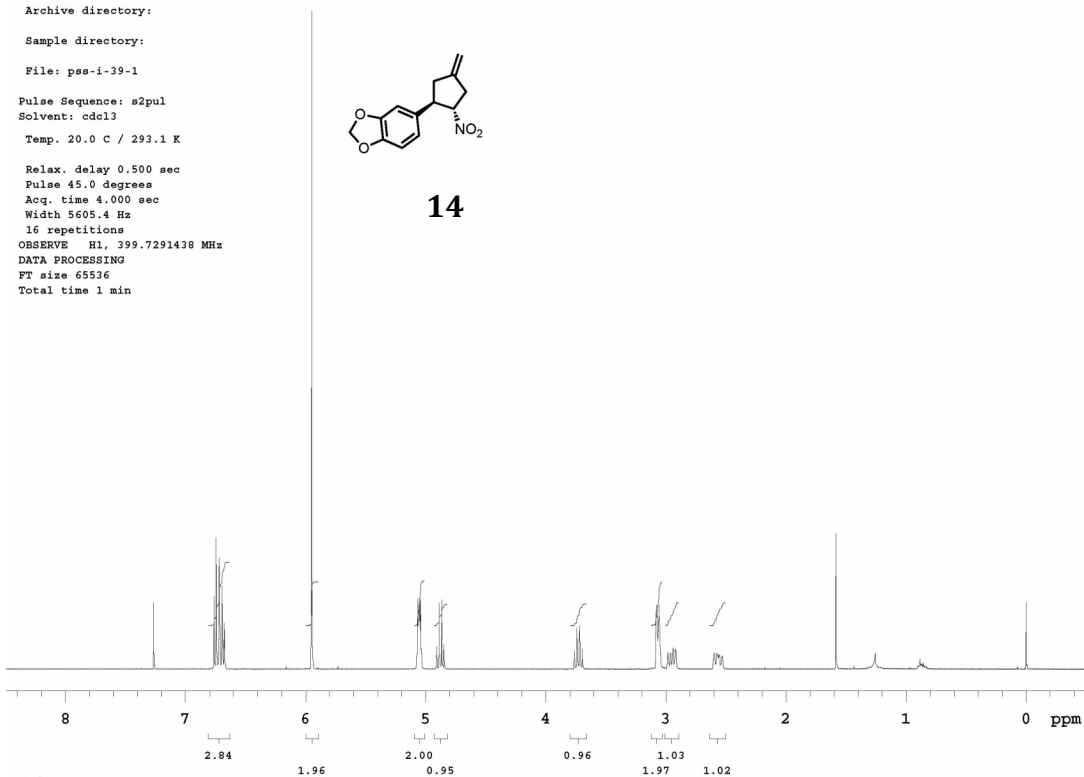

Std proton

Archive directory:  
Sample directory:  
File: pss-i-39-1c13  
Pulse Sequence: s2pul  
Solvent: cdcl3  
Temp. 20.0 C / 293.1 K  
User: 1-14-87

Relax. delay 1.000 sec  
Pulse 40.0 degrees  
Acq. time 1.300 sec  
Width 24509.8 Hz  
376 repetitions  
OBSERVE C13, 100.5119406 MHz  
DECOUPLE H1, 399.7311439 MHz  
Power 43 dB  
continuously on  
WALTZ-16 modulated  
DATA PROCESSING  
Line broadening 0.5 Hz  
FT size 65536  
Total time 19 min

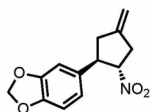

14

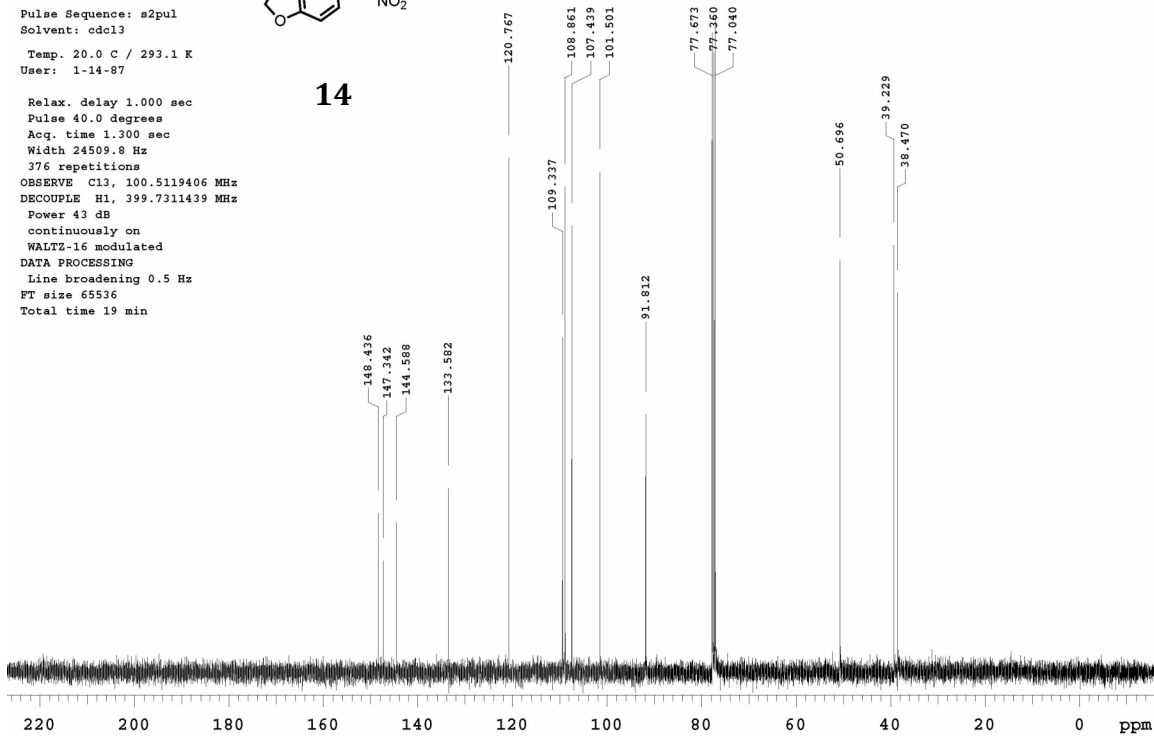

Std proton

Archive directory:

Sample directory:

File: pss-i-16-1

Pulse Sequence: s2pul  
Solvent: cdcl3

Relax. delay 0.500 sec  
Pulse 45.0 degrees  
Acq. time 4.000 sec  
Width 5605.4 Hz  
16 repetitions  
OBSERVE H1, 399.7291437 MHz  
DATA PROCESSING  
FT size 65536  
Total time 1 min

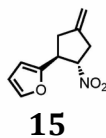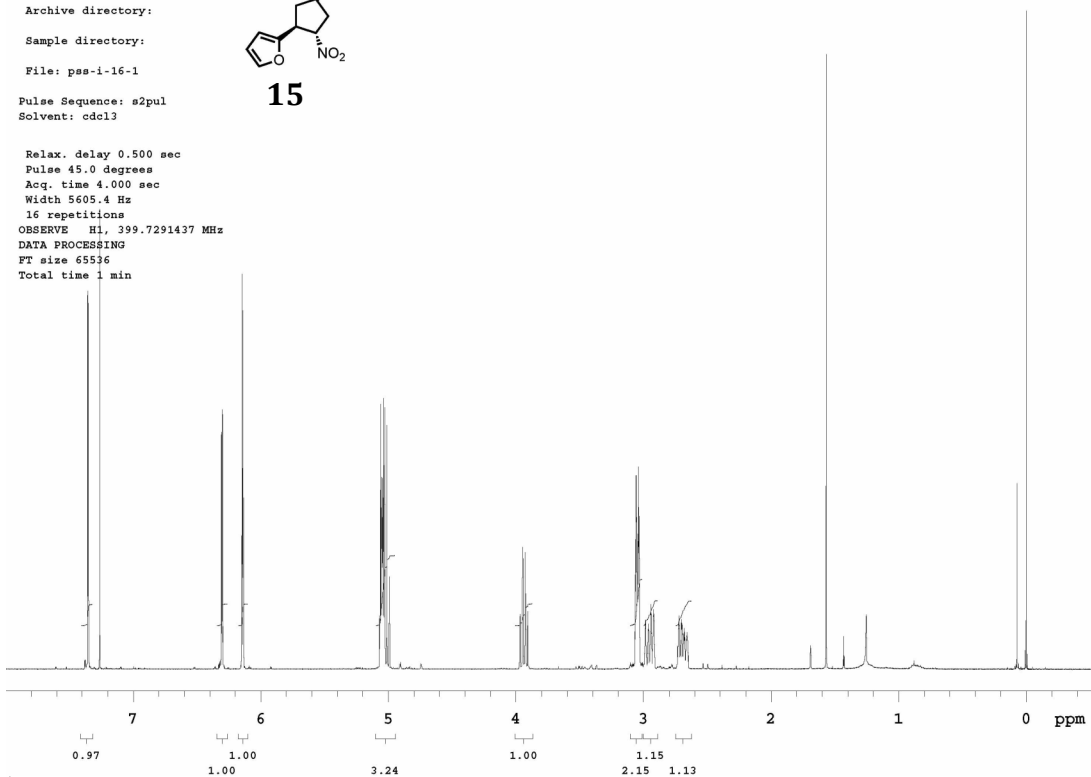

Std proton

File: Carbon PSS-i-16-1cd3  
Pulse Sequence: s2pul  
Solvent: cdcl3  
Ambient temperature  
Operator: psseng  
VNMRS-400 "nmr400"

Relax. delay 1.000 sec  
Pulse 40.0 degrees  
Acq. time 1.300 sec  
Width 24509.8 Hz  
512 repetitions  
OBSERVE C13, 100.5119399 MHz  
DECOUPLE H1, 399.7311439 MHz  
Power 43 dB  
continuously on  
WALTZ-16 modulated  
DATA PROCESSING  
Line broadening 0.5 Hz  
FT size 65536  
Total time 19 min, 42 sec

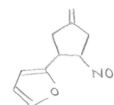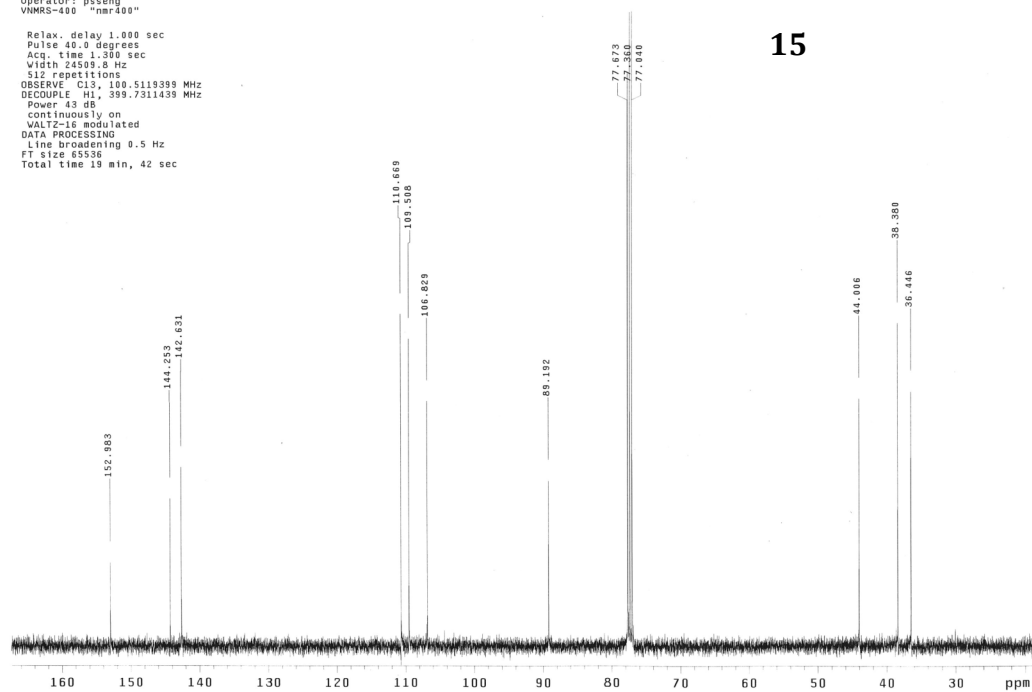

STANDARD 1H OBSERVE

Archive directory:  
/export/home/dbringl/vnmrsys/data  
Sample directory:

File: pss-i-10

Pulse Sequence: s2pul  
Solvent: CDCl3

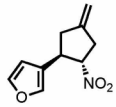

16

Pulse 44.3 degrees  
Acq. time 3.744 sec  
Width 4000.0 Hz  
16 repetitions  
OBSERVE H1, 299.945569 MHz  
DATA PROCESSING  
Line broadening 0.2 Hz  
FT size 32768  
Total time 1 min

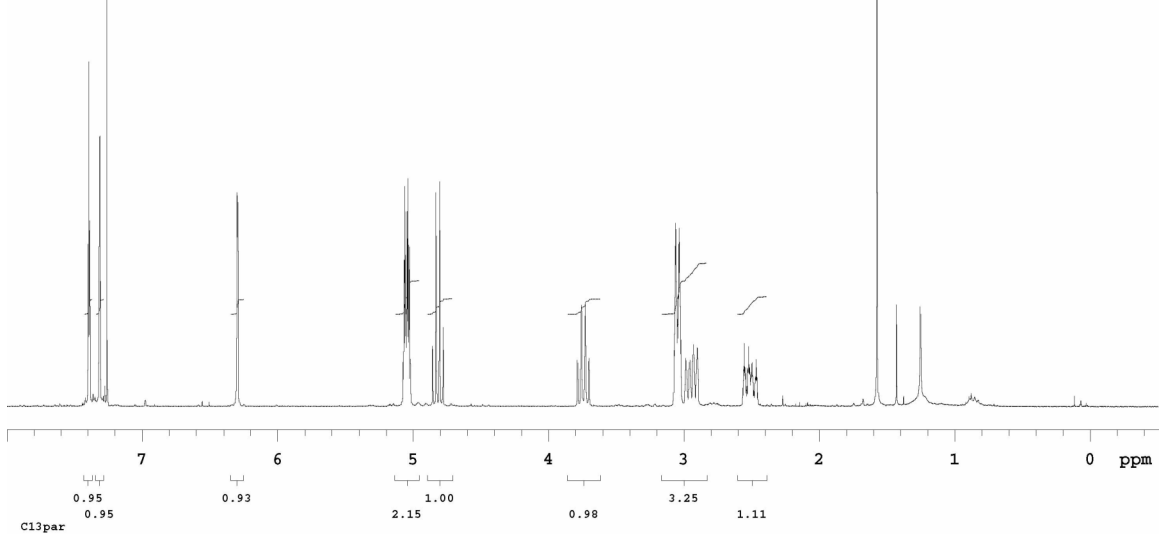

Archive directory:  
/export/home/dbringl/vnmrsys/data  
Sample directory:

File: pss-i-8Cl3

Pulse Sequence: s2pul  
Solvent: CDCl3

User: 1-15-87

Relax. delay 0.500 sec  
Pulse 37.8 degrees  
Acq. time 1.500 sec  
Width 33003.3 Hz  
532 repetitions  
OBSERVE C13, 125.6618356 MHz  
DECOUPLE H1, 499.7505605 MHz  
Power 43 dB  
continuously on  
WALTZ-16 modulated  
DATA PROCESSING  
Line broadening 2.0 Hz  
FT size 131072  
Total time 34 min

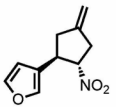

16

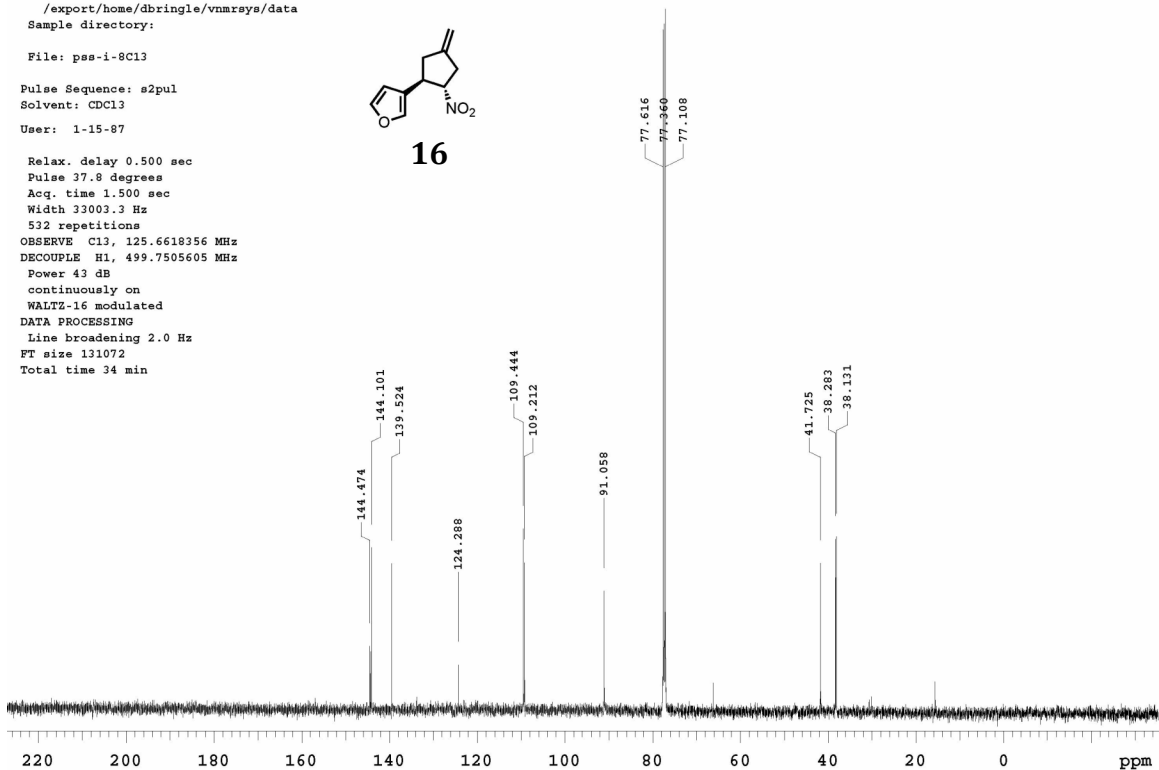

Std proton  
 Archive directory:  
 Sample directory:  
 File: pss-i-11-1  
 Pulse Sequence: s2pul  
 Solvent: cdcl3  
 Relax. delay 0.500 sec  
 Pulse 45.0 degrees  
 Acq. time 4.000 sec  
 Width 5605.4 Hz  
 16 repetitions  
 OBSERVE H1, 399.7291443 MHz  
 DATA PROCESSING  
 FT size 65536  
 Total time 1 min

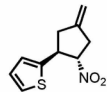

17

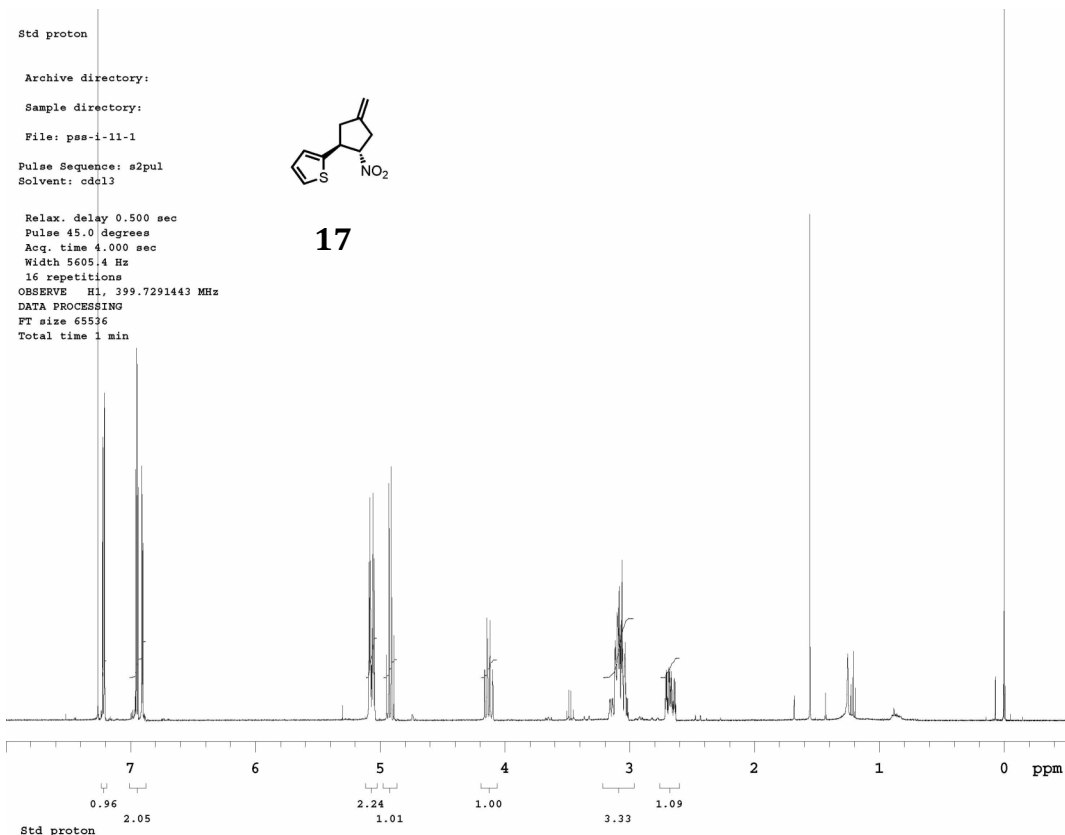

Archive directory:  
 Sample directory:  
 File: pss-i-11-1c13  
 Pulse Sequence: s2pul  
 Solvent: cdcl3  
 User: 1-14-87  
 Relax. delay 1.000 sec  
 Pulse 40.0 degrees  
 Acq. time 1.300 sec  
 Width 24509.8 Hz  
 512 repetitions  
 OBSERVE C13, 100.5119393 MHz  
 DECOUPLE H1, 399.7311439 MHz  
 Power 43 dB  
 continuously on  
 WALTZ-16 modulated  
 DATA PROCESSING  
 Line broadening 0.5 Hz  
 FT size 65536  
 Total time 19 min

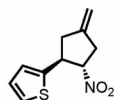

17

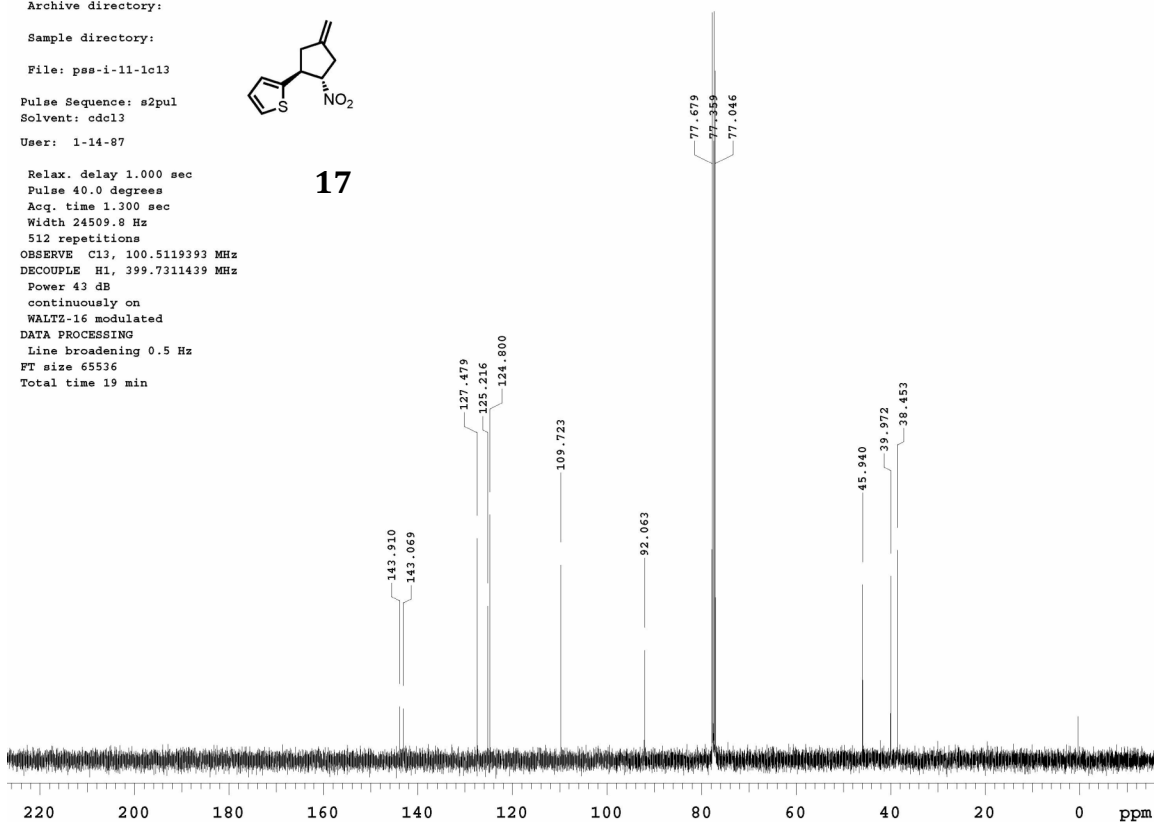

Std proton

Archive directory:

Sample directory:

File: dab-xv-84

Pulse Sequence: s2pul

Solvent: cdcl3

Temp. 23.0 C / 296.1 K

Relax. delay 0.500 sec

Pulse 45.0 degrees

Acq. time 4.000 sec

Width 5605.4 Hz

4 repetitions

OBSERVE H1, 399.7345544 MHz

DATA PROCESSING

FT size 65536

Total time 1 min

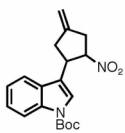

**18**

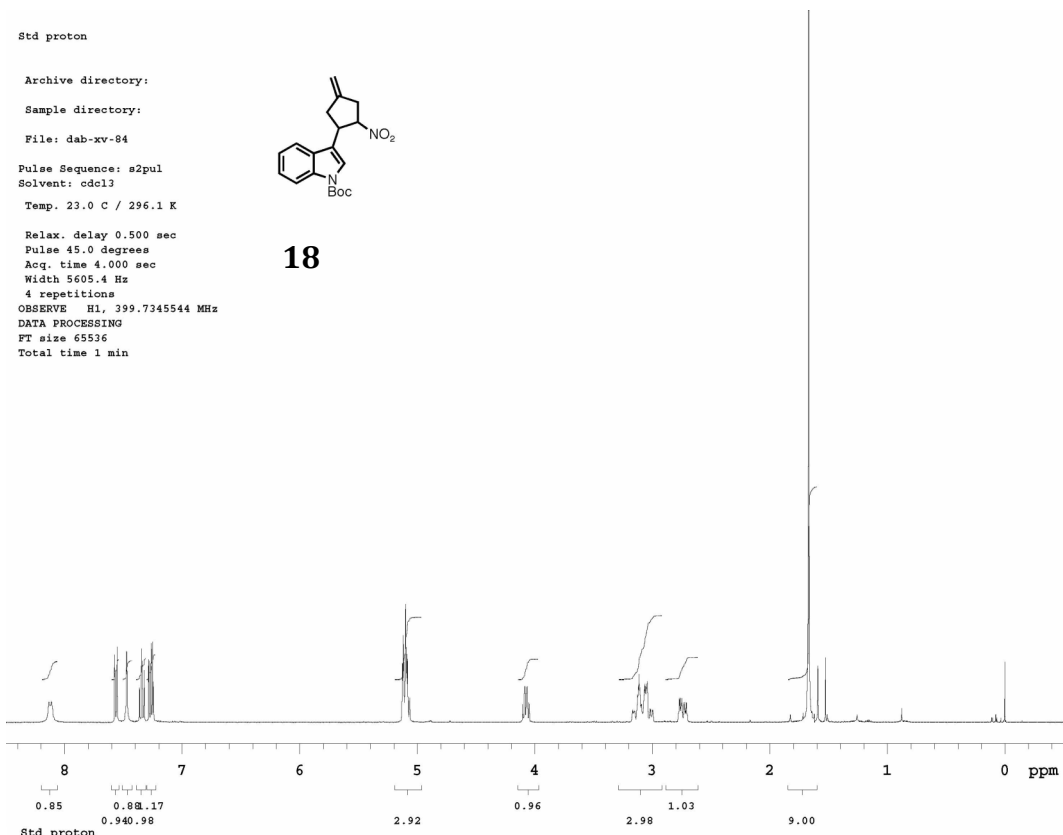

Archive directory:

Sample directory:

File: dab-xv-84Cl3

Pulse Sequence: s2pul

Solvent: cdcl3

Temp. 23.0 C / 296.1 K

User: 1-14-87

Relax. delay 2.500 sec

Pulse 39.5 degrees

Acq. time 1.300 sec

Width 24509.8 Hz

524 repetitions

OBSERVE C13, 100.5133005 MHz

DECOUPLE H1, 399.7365548 MHz

Power 43 dB

continuously on

WALTZ-16 modulated

DATA PROCESSING

Line broadening 0.5 Hz

FT size 65536

Total time 2 hr, 6 min

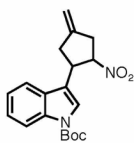

**18**

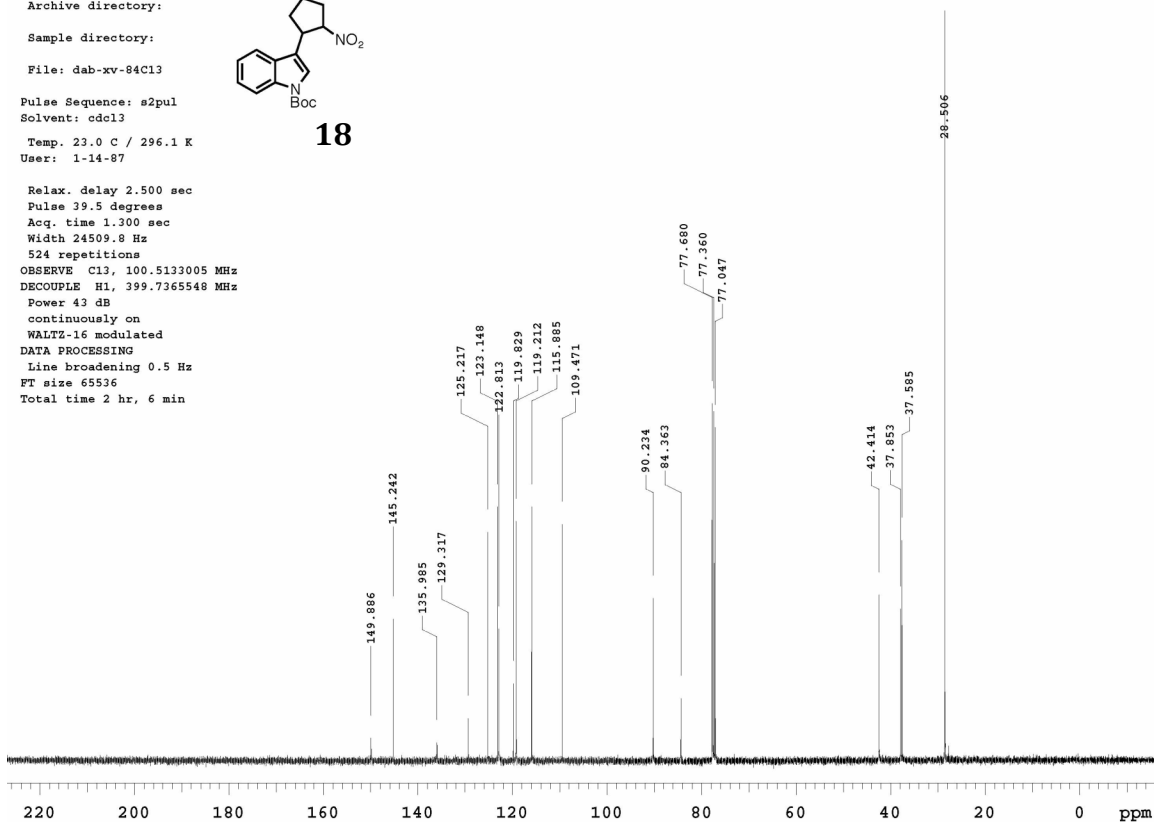

Std proton

Archive directory:  
Sample directory:  
File: pss-i-48-1  
Pulse Sequence: s2pul  
Solvent: cdcl3  
Temp. 20.0 C / 293.1 K  
Relax. delay 0.500 sec  
Pulse 45.0 degrees  
Acq. time 4.000 sec  
Width 5605.4 Hz  
16 repetitions  
OBSERVE H1, 399.7291414 MHz  
DATA PROCESSING  
FT size 65536  
Total time 1 min

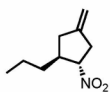

19

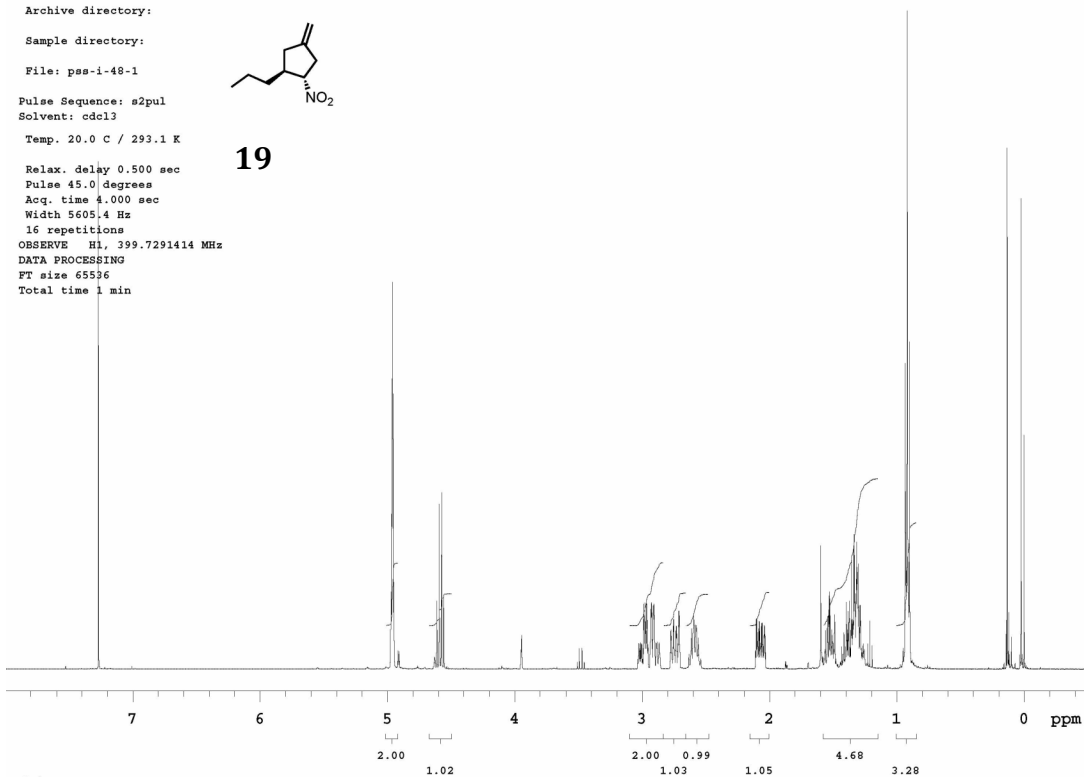

Archive directory:  
Sample directory:  
File: pss-i-48-1c13  
Pulse Sequence: s2pul  
Solvent: cdcl3  
Temp. 20.0 C / 293.1 K  
User: 1-14-87

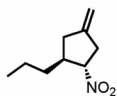

19

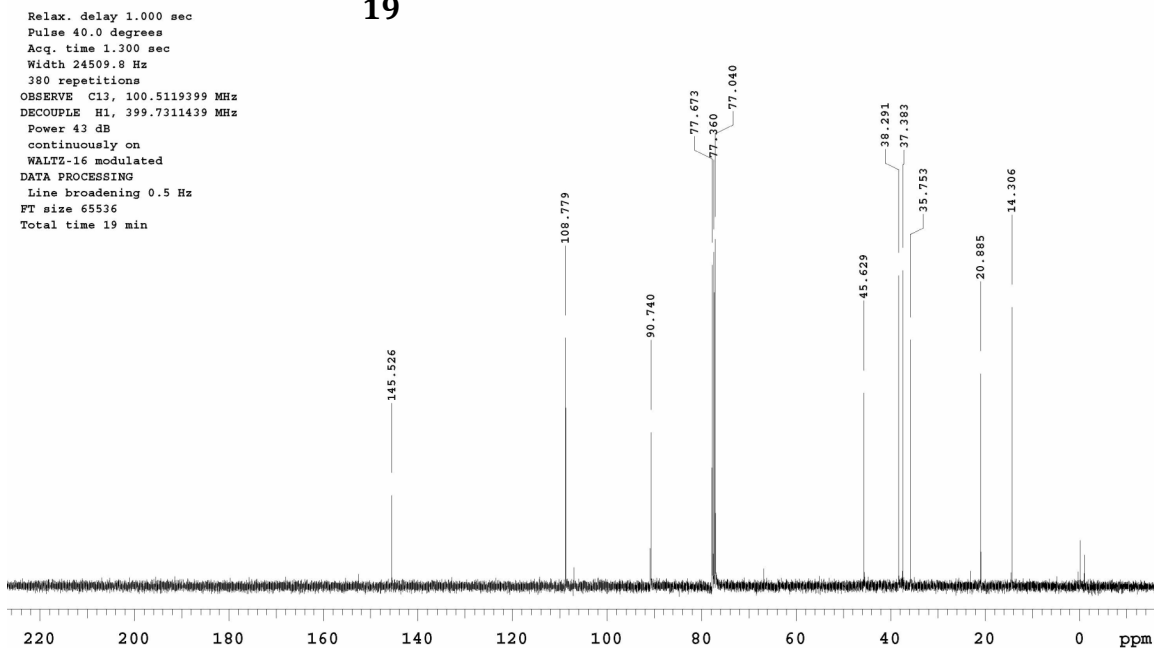

Std proton

Archive directory:  
Sample directory:  
File: pss-i-46-1  
Pulse Sequence: s2pul  
Solvent: cdcl3  
Temp. 20.0 C / 293.1 K

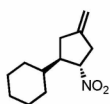

20

Relax. delay 0.500 sec  
Pulse 45.0 degrees  
Acq. time 4.000 sec  
Width 5605.4 Hz  
16 repetitions  
OBSERVE H1, 399.7291421 MHz  
DATA PROCESSING  
FT size 65536  
Total time 1 min

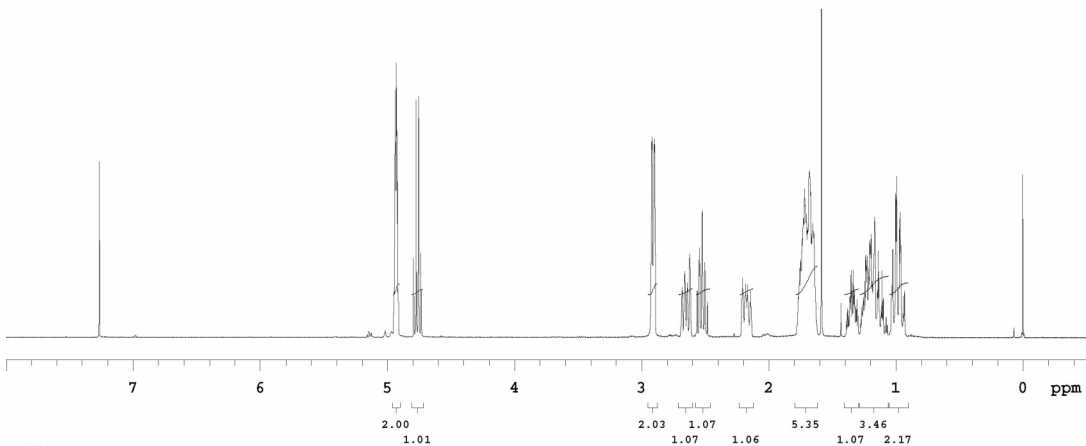

Std proton

Archive directory:  
Sample directory:  
File: pss-i-46-1c13  
Pulse Sequence: s2pul  
Solvent: cdcl3  
Temp. 20.0 C / 293.1 K  
User: 1-14-87

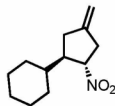

20

Relax. delay 1.000 sec  
Pulse 40.0 degrees  
Acq. time 1.300 sec  
Width 24509.8 Hz  
408 repetitions  
OBSERVE C13, 100.5119399 MHz  
DECOUPLE H1, 399.7311439 MHz  
Power 43 dB  
continuously on  
WALTZ-16 modulated  
DATA PROCESSING  
Line broadening 0.5 Hz  
FT size 65536  
Total time 19 min

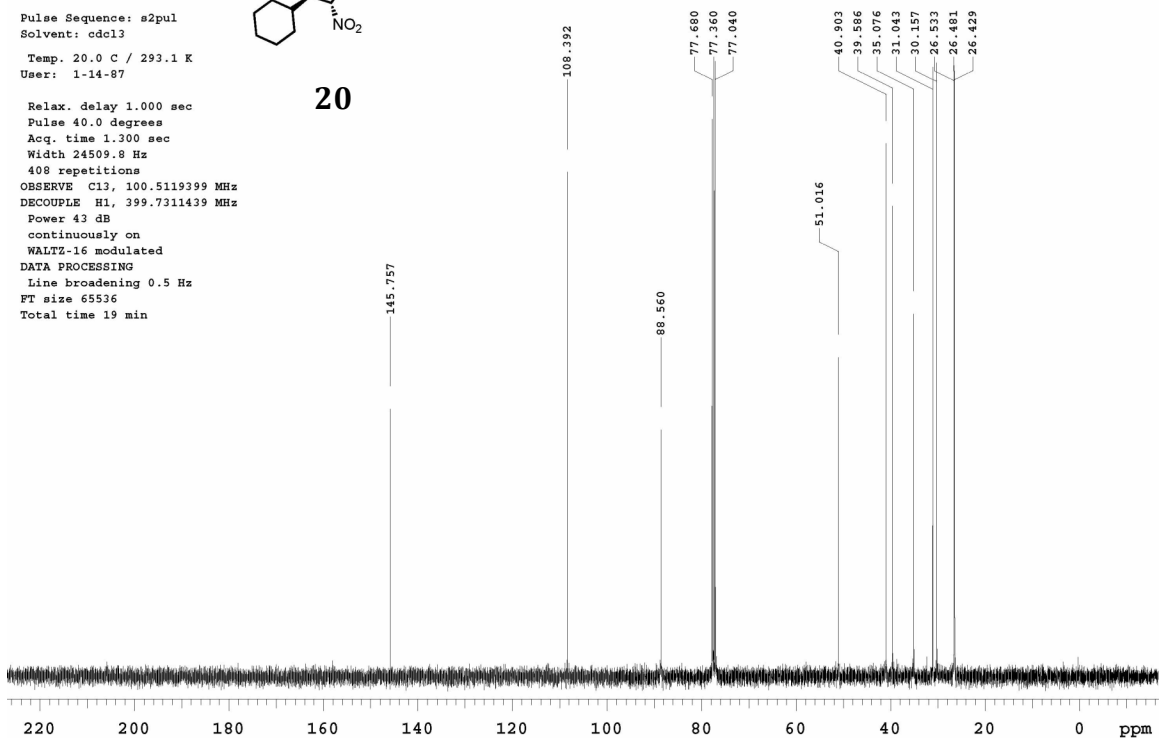

Std proton  
 Archive directory:  
 Sample directory:  
 File: pss-i-58-1  
 Pulse Sequence: s2pul  
 Solvent: cdcl3  
 Relax. delay 0.500 sec  
 Pulse 45.0 degrees  
 Acq. time 4.000 sec  
 Width 5605.4 Hz  
 16 repetitions  
 OBSERVE H1, 399.7291425 MHz  
 DATA PROCESSING  
 FT size 65536  
 Total time 1 min

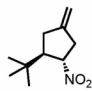

21

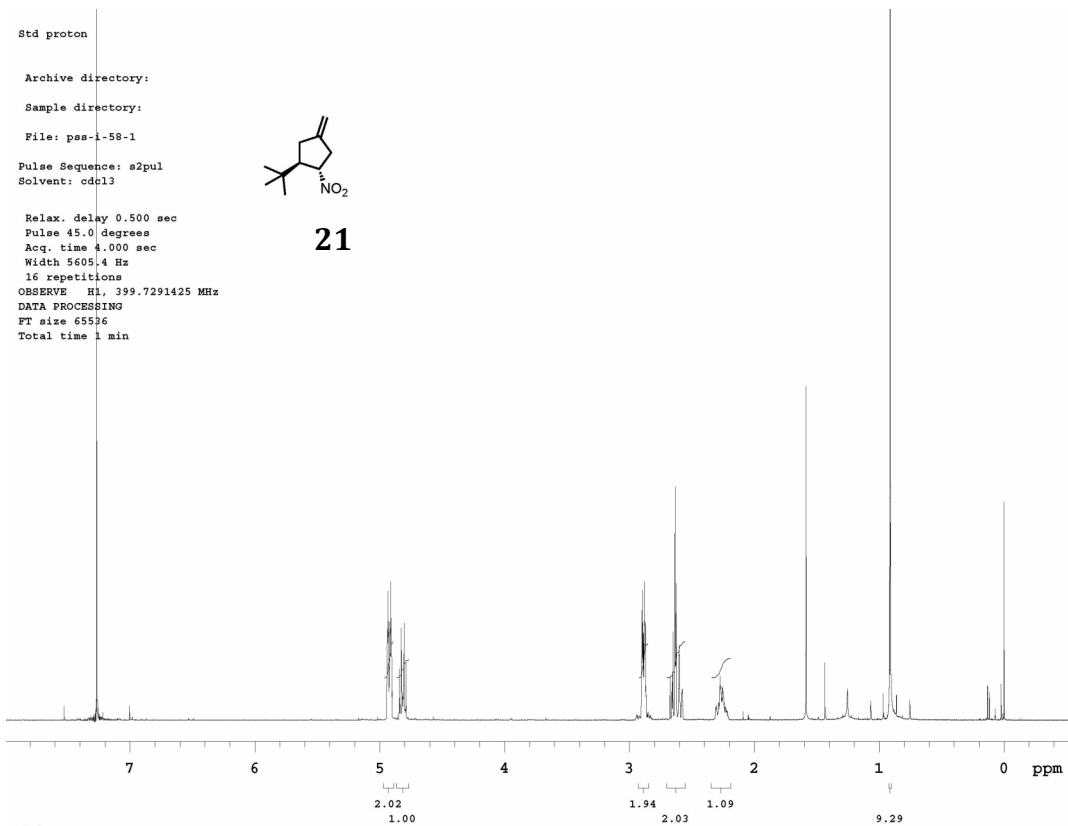

Std proton

Archive directory:  
 Sample directory:  
 File: pss-i-58-cl3  
 Pulse Sequence: s2pul  
 Solvent: cdcl3  
 User: 1-14-87  
 Relax. delay 1.000 sec  
 Pulse 40.0 degrees  
 Acq. time 1.300 sec  
 Width 24509.8 Hz  
 448 repetitions  
 OBSERVE C13, 100.5119391 MHz  
 DECOUPLE H1, 399.7311439 MHz  
 Power 43 dB  
 continuously on  
 WALTZ-16 modulated  
 DATA PROCESSING  
 Line broadening 0.5 Hz  
 FT size 65536  
 Total time 19 min

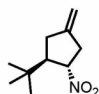

21

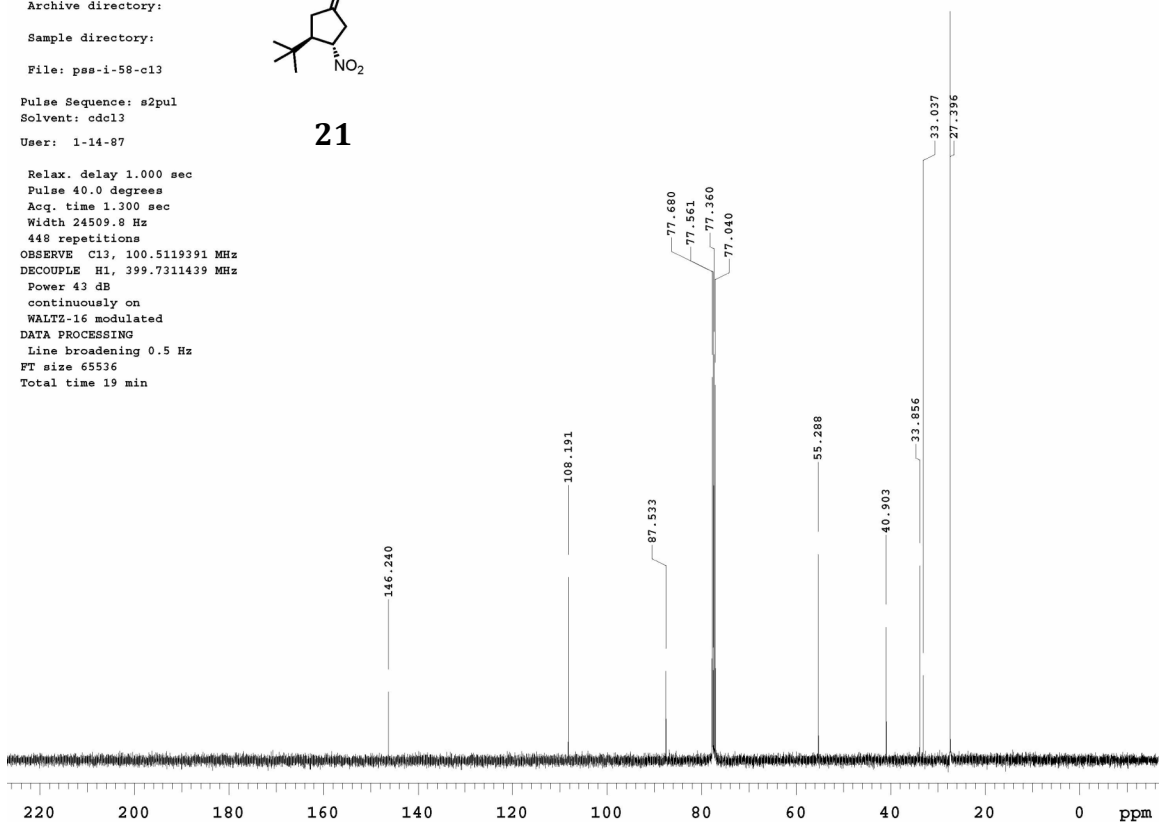



Std proton

Archive directory:  
Sample directory:  
File: pss-i-32-1  
Pulse Sequence: s2pul  
Solvent: cdcl3  
Temp. 20.0 C / 293.1 K

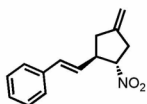

22

Relax. delay 0.500 sec  
Pulse 45.0 degrees  
Acq. time 4.000 sec  
Width 5605.4 Hz  
16 repetitions  
OBSERVE H1, 399.7291452 MHz  
DATA PROCESSING  
FT size 65536  
Total time 1 min

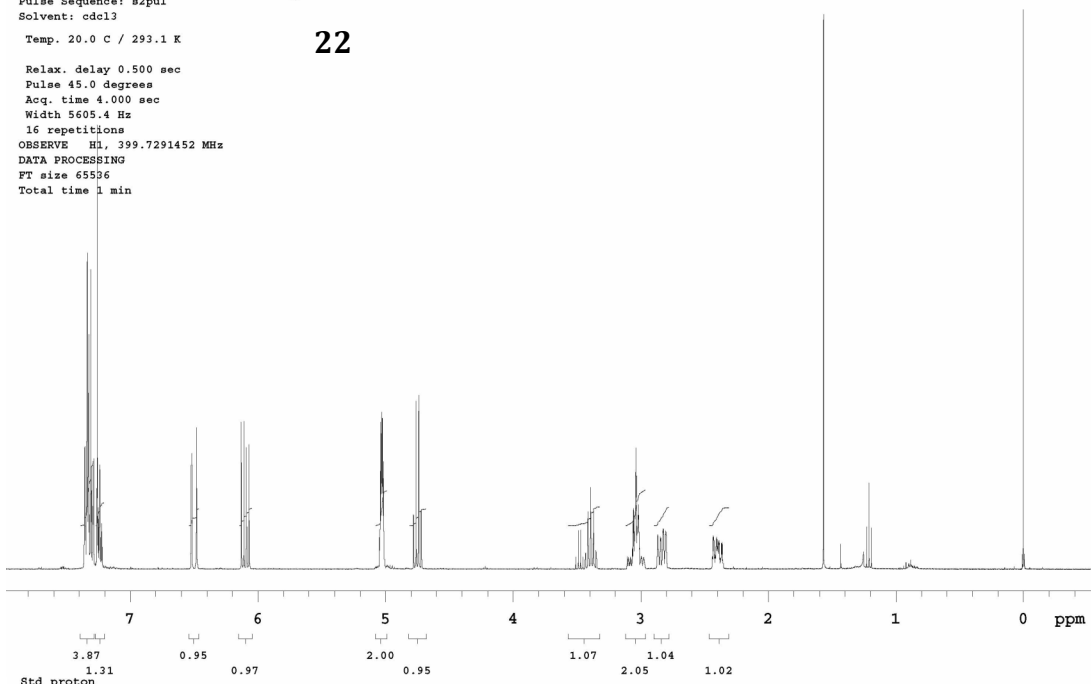

Archive directory:  
Sample directory:  
File: pss-i-32-1c13  
Pulse Sequence: s2pul  
Solvent: cdcl3  
Temp. 20.0 C / 293.1 K  
User: 1-14-87

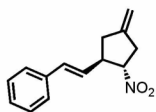

22

Relax. delay 1.000 sec  
Pulse 40.0 degrees  
Acq. time 1.300 sec  
Width 24509.8 Hz  
512 repetitions  
OBSERVE C13, 100.5119399 MHz  
DECOUPLE H1, 399.7311439 MHz  
Power 43 dB  
continuously on  
WALTZ-16 modulated  
DATA PROCESSING  
Line broadening 0.5 Hz  
FT size 65536  
Total time 19 min

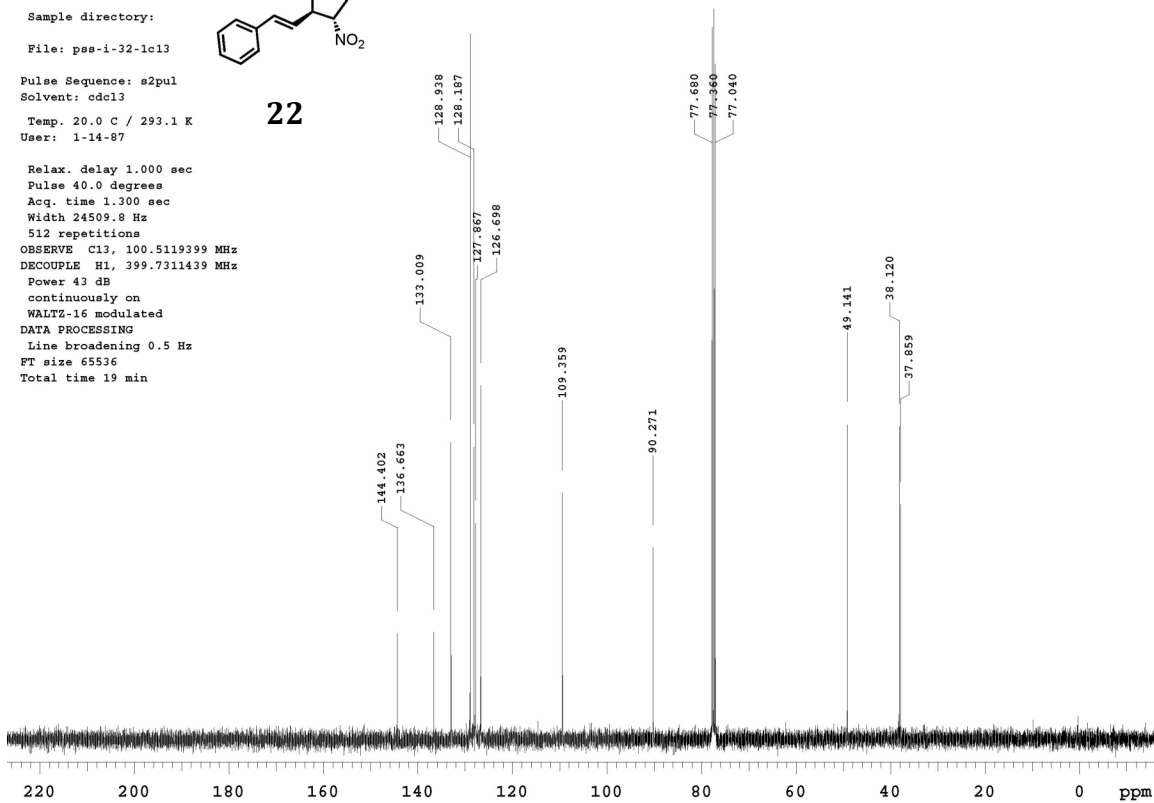

Std proton

Archive directory:  
Sample directory:  
File: dab-vii-09  
Pulse Sequence: s2pul  
Solvent: cdcl3  
Temp. 22.0 C / 295.1 K  
Relax. delay 0.500 sec  
Pulse 45.0 degrees  
Acq. time 4.000 sec  
Width 5605.4 Hz  
16 repetitions  
OBSERVE H1, 399.7291454 MHz  
DATA PROCESSING  
FT size 65536  
Total time 1 min

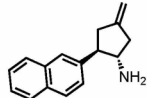

23

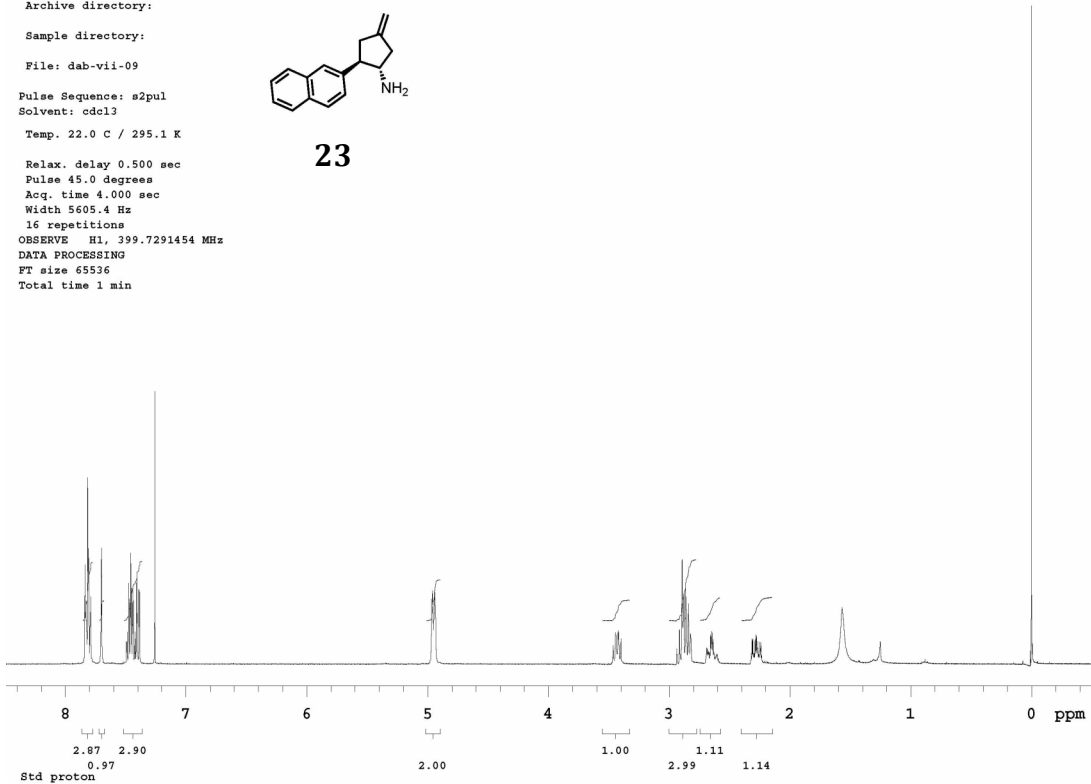

Archive directory:  
Sample directory:  
File: dab-vii-27C13  
Pulse Sequence: s2pul  
Solvent: cdcl3  
Temp. 22.0 C / 295.1 K  
User: 1-14-87  
Relax. delay 1.000 sec  
Pulse 40.0 degrees  
Acq. time 1.300 sec  
Width 24509.8 Hz  
944 repetitions  
OBSERVE C13, 100.5119399 MHz  
DECOUPLE H1, 399.7311439 MHz  
Power 43 dB  
continuously on  
WALTZ-16 modulated  
DATA PROCESSING  
Line broadening 0.5 Hz  
FT size 65536  
Total time 38 min

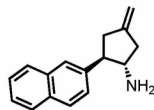

23

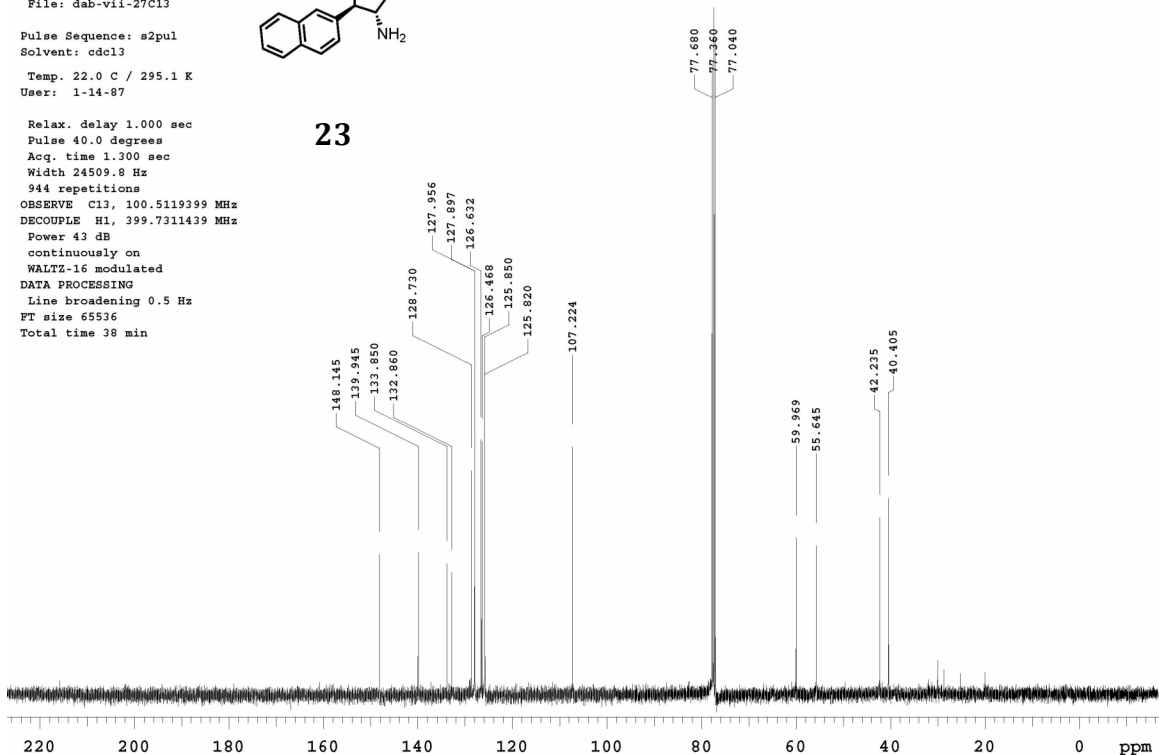

Std proton

Archive directory:

Sample directory:

File: dab-vii-16

Pulse Sequence: s2pul

Solvent: cdcl3

Temp. 22.0 C / 295.1 K

Relax. delay 0.500 sec

Pulse 45.0 degrees

Acq. time 4.000 sec

Width 5605.4 Hz

16 repetitions

OBSERVE H1, 399.7291446 MHz

DATA PROCESSING

FT size 65536

Total time 1 min

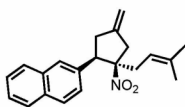

25

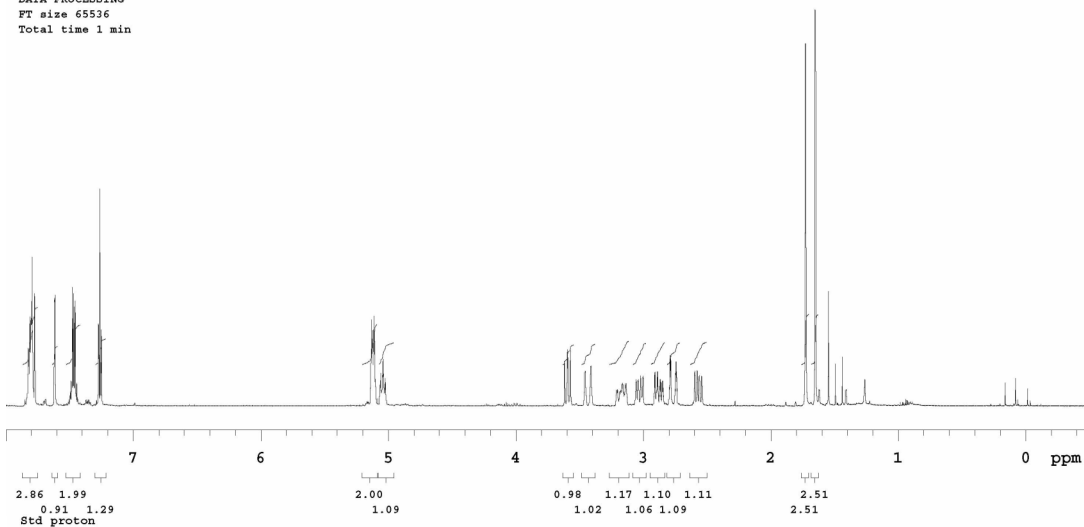

Archive directory:

Sample directory:

File: dab-vii-16C13

Pulse Sequence: s2pul

Solvent: cdcl3

Temp. 22.0 C / 295.1 K

User: 1-14-87

Relax. delay 1.000 sec

Pulse 40.0 degrees

Acq. time 1.300 sec

Width 24509.8 Hz

512 repetitions

OBSERVE C13, 100.5119391 MHz

DECOUPLE H1, 399.7311439 MHz

Power 43 dB

continuously on

WALTZ-16 modulated

DATA PROCESSING

Line broadening 0.5 Hz

FT size 65536

Total time 19 min

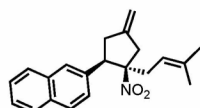

25

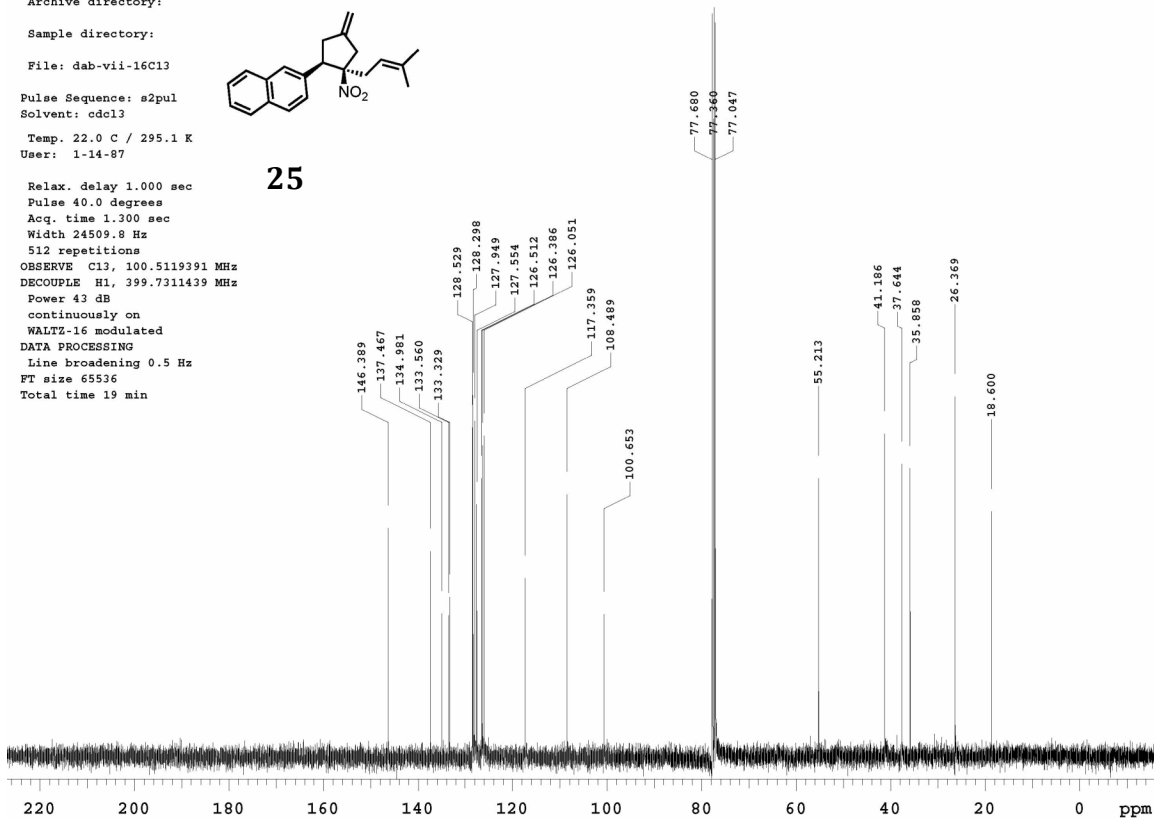

Std proton

Archive directory:

Sample directory:

File: dab-vii-01Proton

Pulse Sequence: s2pul

Solvent: cdcl3

Temp. 22.0 C / 295.1 K

Relax. delay 0.500 sec

Pulse 45.0 degrees

Acq. time 4.000 sec

Width 5605.4 Hz

16 repetitions

OBSERVE H1, 399.7291444 MHz

DATA PROCESSING

FT size 65536

Total time 1 min

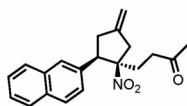

26

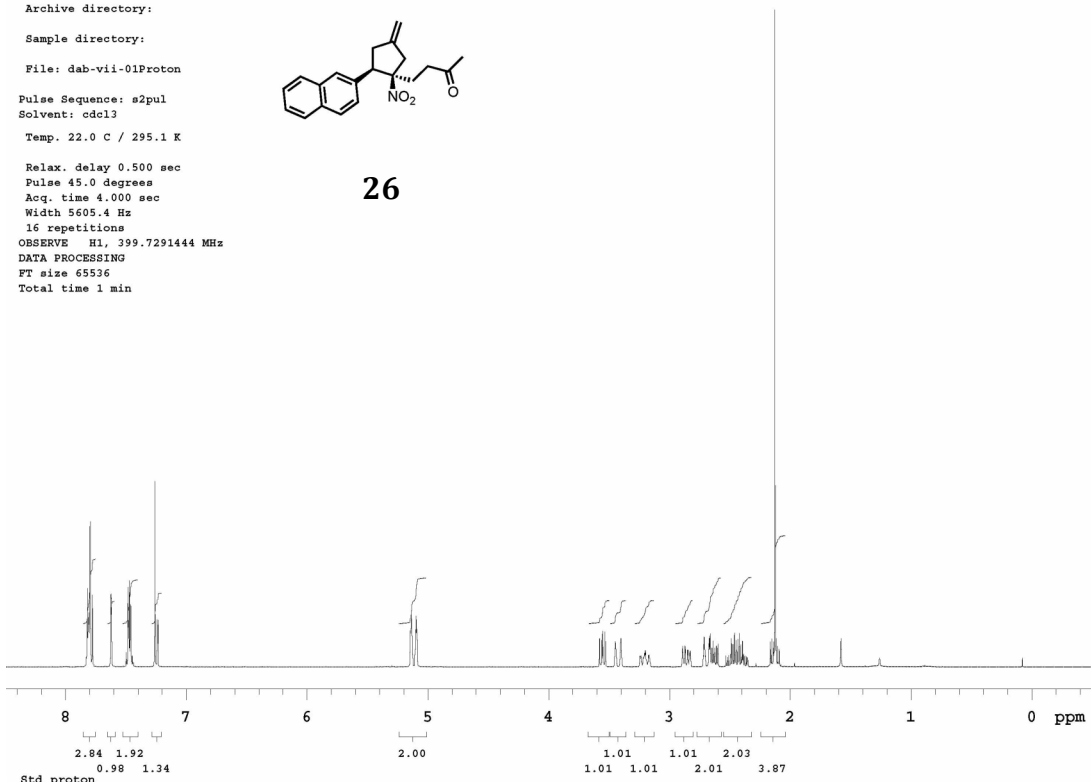

Std proton

Archive directory:

Sample directory:

File: dab-vii-01C13

Pulse Sequence: s2pul

Solvent: cdcl3

Temp. 22.0 C / 295.1 K

User: 1-14-87

Relax. delay 1.000 sec

Pulse 40.0 degrees

Acq. time 1.300 sec

Width 24509.8 Hz

664 repetitions

OBSERVE C13, 100.5119406 MHz

DECOUPLE H1, 399.7311439 MHz

Power 43 dB

continuously on

WALTZ-16 modulated

DATA PROCESSING

Line broadening 0.5 Hz

FT size 65536

Total time 38 min

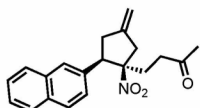

26

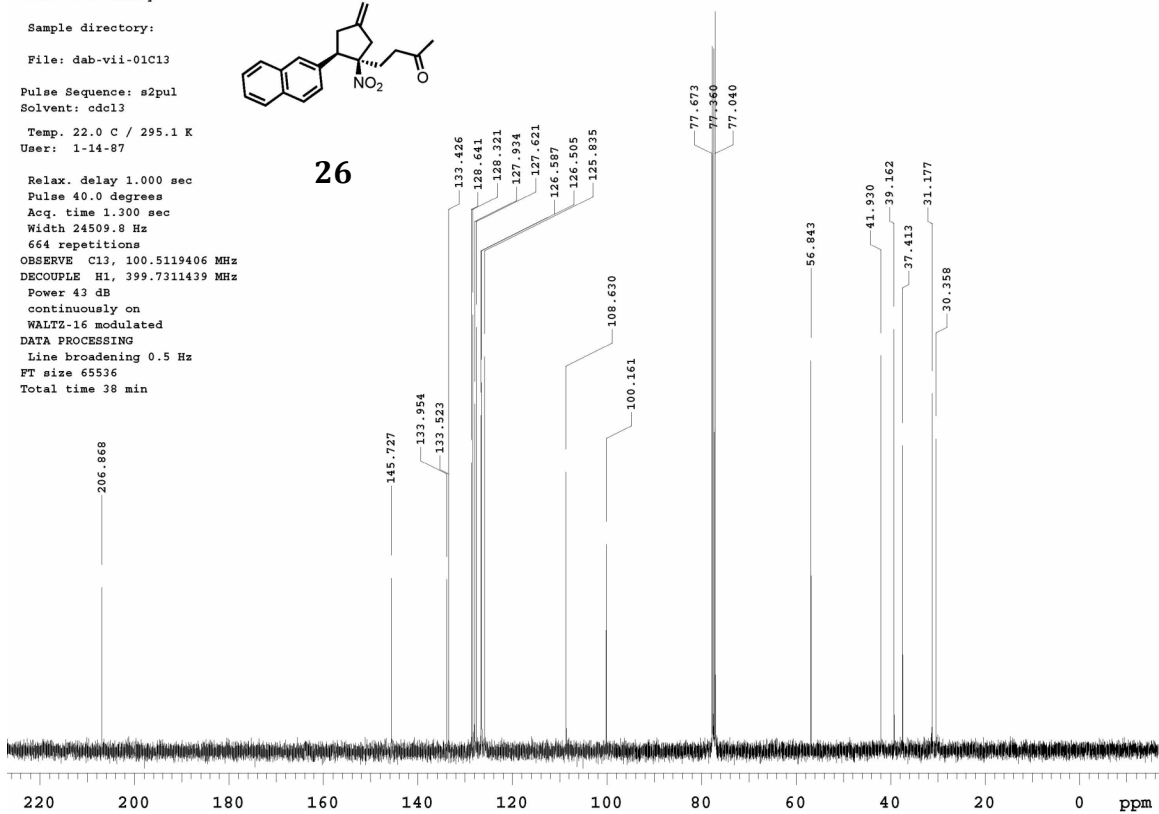

Std proton

Archive directory:  
Sample directory:  
File: dab-vii-25  
Pulse Sequence: s2pul  
Solvent: cdcl3  
Temp. 22.0 C / 295.1 K

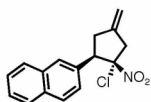

27

Relax. delay 0.500 sec  
Pulse 45.0 degrees  
Acq. time 4.000 sec  
Width 5605.4 Hz  
16 repetitions  
OBSERVE H1, 399.7291775 MHz  
DATA PROCESSING  
FT size 65536  
Total time 1 min

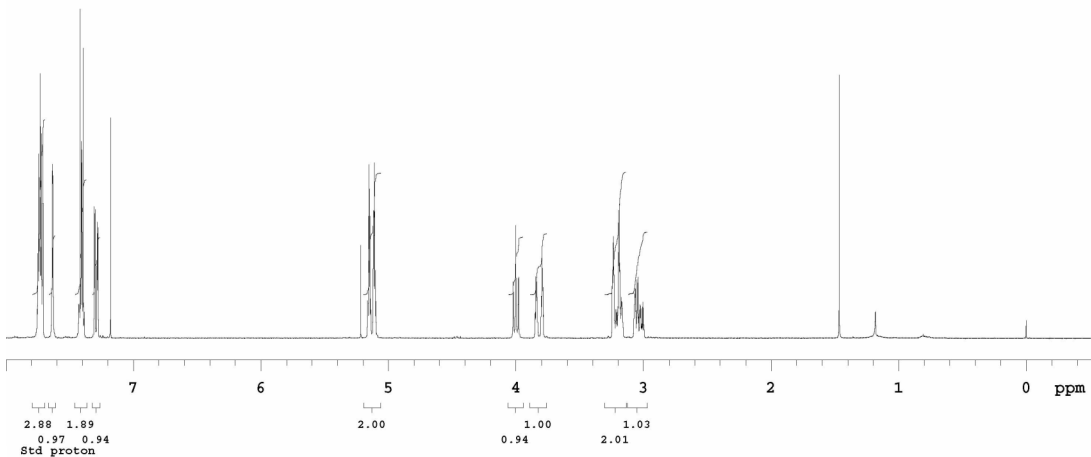

Archive directory:  
Sample directory:  
File: dab-vii-25C13  
Pulse Sequence: s2pul  
Solvent: cdcl3  
Temp. 22.0 C / 295.1 K  
User: 1-14-87

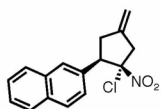

27

Relax. delay 1.000 sec  
Pulse 40.0 degrees  
Acq. time 1.300 sec  
Width 24509.8 Hz  
920 repetitions  
OBSERVE C13, 100.5119399 MHz  
DECOUPLE H1, 399.7311439 MHz  
Power 43 dB  
continuously on  
WALTZ-16 modulated  
DATA PROCESSING  
Line broadening 0.5 Hz  
FT size 65536  
Total time 39 min

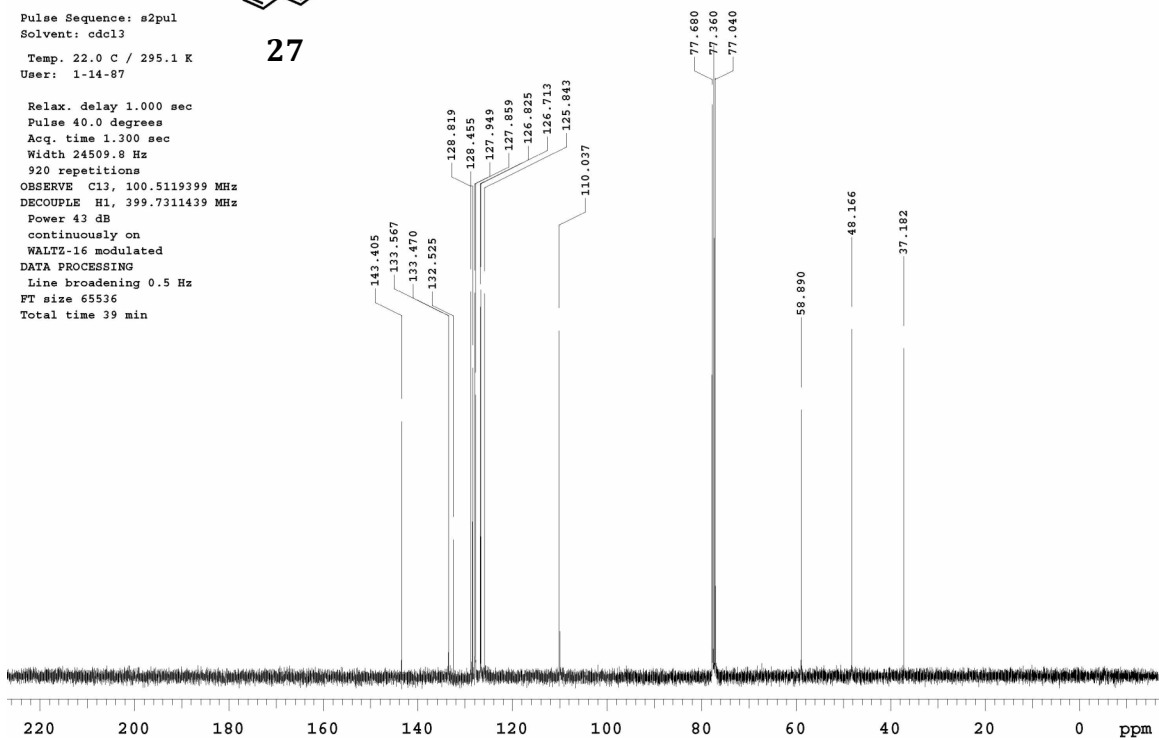

Std proton

Archive directory:  
Sample directory:  
File: dab-xv-71  
Pulse Sequence: s2pul  
Solvent: cdcl3  
Temp. 23.0 C / 296.1 K

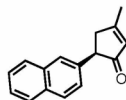

28

Relax. delay 0.500 sec  
Pulse 45.0 degrees  
Acq. time 4.000 sec  
Width 5605.4 Hz  
8 repetitions  
OBSERVE H1, 399.7345551 MHz  
DATA PROCESSING  
FT size 65536  
Total time 1 min

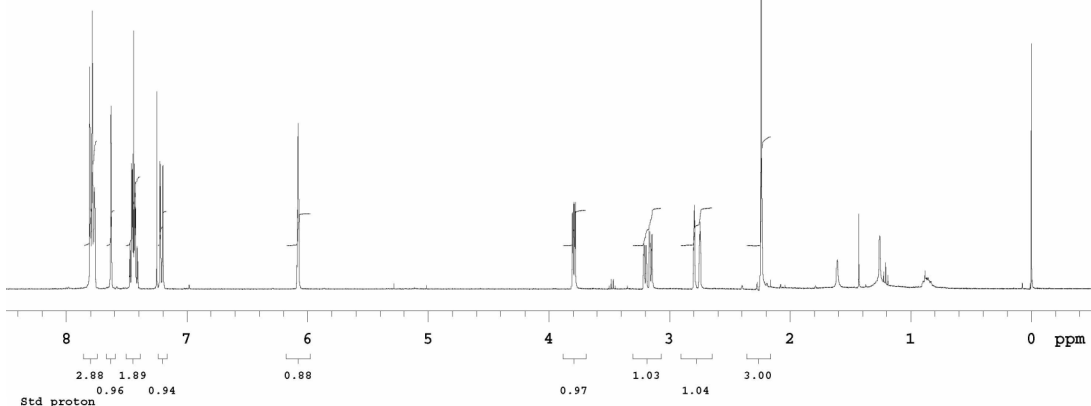

Archive directory:  
Sample directory:  
File: dab-xv-71C13  
Pulse Sequence: s2pul  
Solvent: cdcl3  
Temp. 23.0 C / 296.1 K  
User: 1-14-87

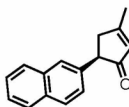

28

Relax. delay 1.000 sec  
Pulse 39.5 degrees  
Acq. time 1.300 sec  
Width 24509.8 Hz  
180 repetitions  
OBSERVE C13, 100.5133005 MHz  
DECOUPLE H1, 399.7365548 MHz  
Power 43 dB  
continuously on  
WALTZ-16 modulated  
DATA PROCESSING  
Line broadening 0.5 Hz  
FT size 65536  
Total time 19 min

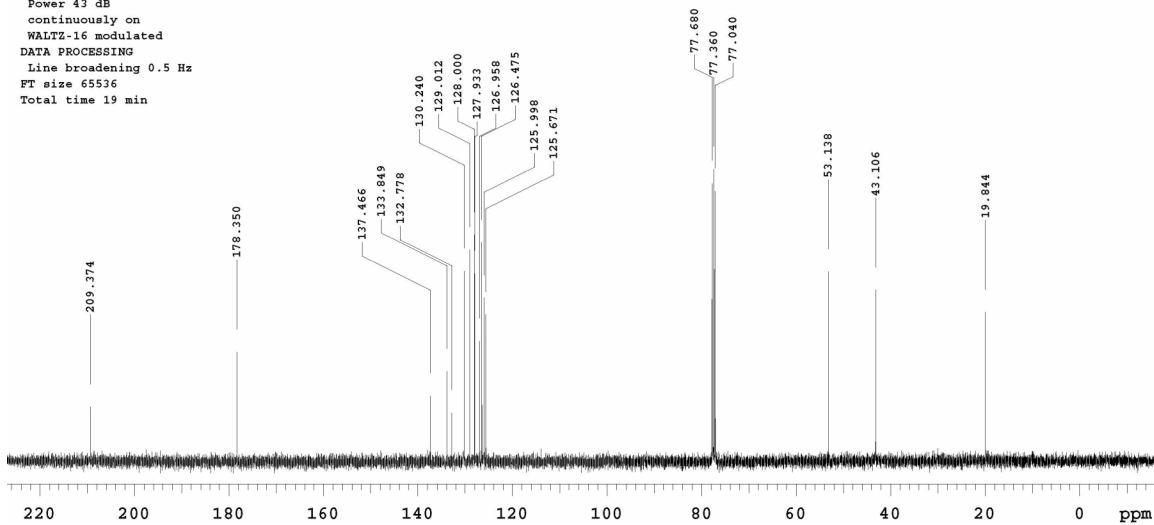

---

<sup>1</sup> Perrin, D. D.; Armarego, W. L. F. *Purification of Laboratory Chemicals*, 5<sup>th</sup> Ed.; Pergamon Press: Oxford, 1988.

<sup>2</sup> Komiya, S. *Synthesis of Organometallic Compounds. A Practical Guide*; John Wiley & Sons: New York, 1997.

<sup>3</sup> Trost, B. M.; Chan, D. M. T. *J. Am. Chem. Soc.* **1979**, *101*, 6429.

<sup>4</sup> Rimkus, A.; Sewald, N. *Org. Lett.* **2003**, *5*, 79.

<sup>5</sup> Trost, B. M.; Silverman, S. M.; Stambuli, J. P. *J. Am. Chem. Soc.* **2007**, *129*, 12398.

<sup>6</sup> Worrall, D. E. *Org. Synth.* **1929**, *9*, 66.
